# Supplementary material for: Synthesis, characterization, and reactivity of dinuclear organo-rare-earth-metal alkyl complexes supported by 2-amidate-functionalized indolyl ligands: substituent effects on coordination and reactivity
Source: Royal Society of Chemistry journal article supplement (doi:10.1039/c9dt00507b), 2019-01-01
Supplement: c9dt00507b1.pdf [file c9dt00507b1.pdf]

Supporting Information:

**Synthesis, Characterization and Reactivity of Dinuclear  
Organo-Rare-Earth Metal Alkyl Complexes Supported by 2-  
Amidate-Functionalized Indolyl Ligands: Substituent Effects  
on Coordination and Reactivity**

Dongjing Hong,<sup>a</sup> Xiancui Zhu,<sup>\*a</sup> Shaowu Wang,<sup>\*a,b,c</sup> Yun Wei,<sup>a</sup> Shuangliu Zhou,<sup>a</sup>  
Zeming Huang,<sup>a</sup> Shan Zhu,<sup>a</sup> Ruru Wang,<sup>a</sup> Wenrun Yue<sup>a</sup> and Xiaolong Mu<sup>a</sup>

<sup>a</sup> Laboratory of Functional Molecular Solids, Ministry of Education, Anhui Laboratory  
of Molecule-Based Materials, College of Chemistry and Materials Science, Anhui  
Normal University, Wuhu, Anhui 241002, P. R. China

<sup>b</sup> College of Biological and Chemical Engineering, Anhui Polytechnic University, Wuhu,  
Anhui 241000, P. R. China.

<sup>c</sup> State Key Laboratory of Organometallic Chemistry, Shanghai Institute of Organic  
Chemistry, Chinese Academy of Sciences, Shanghai 200032, P. R. China

## Contents

- Figure S1.**  $^1\text{H}$  NMR spectrum of pro-ligand  $\text{H}_2\text{L}^1$
- Figure S2.**  $^{13}\text{C}$  NMR spectrum of pro-ligand  $\text{H}_2\text{L}^1$
- Figure S3.**  $^1\text{H}$  NMR spectrum of pro-ligand  $\text{H}_2\text{L}^2$
- Figure S4.**  $^{13}\text{C}$  NMR spectrum of pro-ligand  $\text{H}_2\text{L}^2$
- Figure S5.**  $^1\text{H}$  NMR spectrum of complex **1c** in  $\text{C}_6\text{D}_6$
- Figure S6.**  $^{13}\text{C}$  NMR spectrum of complex **1c** in  $\text{C}_6\text{D}_6$
- Figure S7.**  $^1\text{H}$  NMR spectrum of complex **1cb** in  $\text{THF-}d_8$
- Figure S8.**  $^{13}\text{C}$  NMR spectrum of complex **1cb** in  $\text{THF-}d_8$
- Figure S9.**  $^1\text{H}$  NMR spectrum of complex **1cc** in  $\text{THF-}d_8$
- Figure S10.**  $^{13}\text{C}$  NMR spectrum of complex **1cc** in  $\text{THF-}d_8$
- Figure S11.**  $^1\text{H}$  NMR Spectrum of Polyisoprene for Table 2, Entry 4
- Figure S12.**  $^{13}\text{C}$ -int NMR Spectrum of Polyisoprene for Table 2, Entry 4
- Figure S13.**  $^1\text{H}$  NMR Spectrum of Polyisoprene for Table 2, Entry 7
- Figure S14.**  $^1\text{H}$  NMR Spectrum of Polyisoprene for Table 2, Entry 8
- Figure S15.**  $^1\text{H}$  NMR Spectrum of Polyisoprene for Table 2, Entry 9
- Figure S16.**  $^1\text{H}$  NMR Spectrum of Polyisoprene for Table 2, Entry 10
- Figure S17.**  $^1\text{H}$  NMR Spectrum of Polyisoprene for Table 2, Entry 11
- Figure S18.**  $^1\text{H}$  NMR Spectrum of Polyisoprene for Table 2, Entry 12
- Figure S19.**  $^1\text{H}$  NMR Spectrum of Polyisoprene for Table 2, Entry 13
- Figure S20.**  $^1\text{H}$  NMR Spectrum of Polyisoprene for Table 3, Entry 2
- Figure S21.**  $^{13}\text{C}$ -int NMR Spectrum of Polyisoprene for Table 3, Entry 2
- Figure S22.**  $^1\text{H}$  NMR Spectrum of Polyisoprene for Table 3, Entry 3
- Figure S23.**  $^{13}\text{C}$ -int NMR Spectrum of Polyisoprene for Table 3, Entry 3
- Figure S24.**  $^1\text{H}$  NMR Spectrum of Polyisoprene for Table 3, Entry 4
- Figure S25.**  $^1\text{H}$  NMR Spectrum of Polyisoprene for Table 3, Entry 5
- Figure S26.**  $^1\text{H}$  NMR Spectrum of Polyisoprene for Table 3, Entry 6
- Figure S27.**  $^1\text{H}$  NMR Spectrum of Polyisoprene for Table 3, Entry 7
- Figure S28.**  $^1\text{H}$  NMR Spectrum of Polyisoprene for Table 3, Entry 8
- Figure S29.**  $^1\text{H}$  NMR Spectrum of Polyisoprene for Table 3, Entry 9

**Figure S30.**  $^{13}\text{C}$ -int NMR Spectrum of Polyisoprene for Table 3, Entry 9  
**Figure S31.**  $^1\text{H}$  NMR Spectrum of Polyisoprene for Table 3, Entry 17  
**Figure S32.**  $^{13}\text{C}$ -int NMR Spectrum of Polyisoprene for Table 3, Entry 17  
**Figure S33.** Single-crystal structure of the complex **1a**  
**Figure S34.** Single-crystal structure of the complex **1b**  
**Figure S35.** Single-crystal structure of the complex **1c**  
**Figure S36.** Single-crystal structure of the complex **1d**  
**Figure S37.** Single-crystal structure of the complex **1e**  
**Figure S38.** Single-crystal structure of the complex **1ca**  
**Figure S39.** Single-crystal structure of the complex **1cb**  
**Figure S40.** Single-crystal structure of the complex **1cc**  
**Figure S41.** Single-crystal structure of the complex **1ea**  
**Figure S42.** Single-crystal structure of the complex **1eb**  
**Figure S43.** Single-crystal structure of the complex **1ec**  
**Figure S44.** Single-crystal structure of the complex **1ed**  
**Figure S45.** Single-crystal structure of the complex **1ee**  
**Figure S46.** Single-crystal structure of the complex **1ef**  
**Figure S47.** Single-crystal structure of the complex **2a**  
**Figure S48.** Single-crystal structure of the complex **2b**  
**Figure S49.** Single-crystal structure of the complex **2c**  
**Figure S50.** Single-crystal structure of the complex **2d**  
**Figure S51.** Single-crystal structure of the complex **2e**  
**Figure S52.** Single-crystal structure of the complex **2ea**  
**Figure S53.** Single-crystal structure of the complex **2eb**  
**Figure S54.** Single-crystal structure of the complex **3a**  
**Table S1.** Crystal data and structure refinement for **1a-1c**  
**Table S2.** Crystal data and structure refinement for **1d-1e**  
**Table S3.** Crystal data and structure refinement for **1ca-1cc**  
**Table S4.** Crystal data and structure refinement for **1ea-1ec**  
**Table S5.** Crystal data and structure refinement for **3a** and **1ed**

**Table S6.** Crystal data and structure refinement for **1ee-1ef**

**Table S7.** Crystal data and structure refinement for **2a-2c**

**Table S8.** Crystal data and structure refinement for **2d-2e**

**Table S9.** Crystal data and structure refinement for **2ea-2eb**

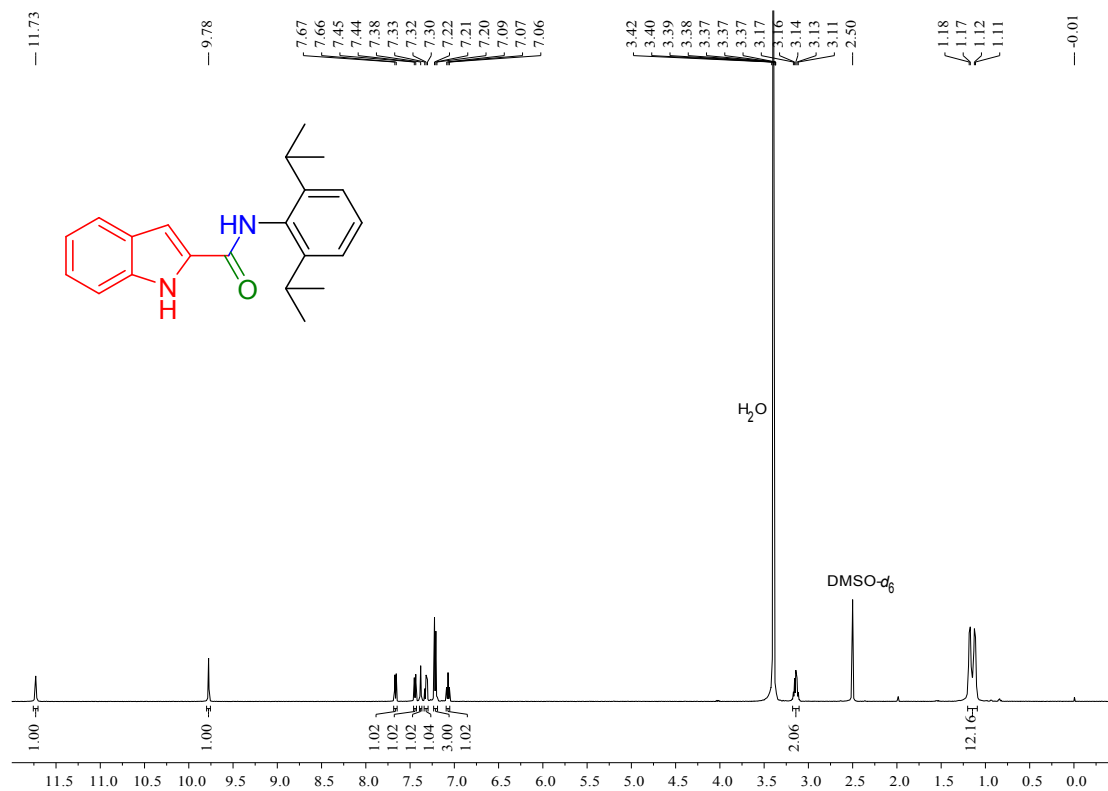

**Figure S1.**  $^1\text{H}$  NMR spectrum of pro-ligand  $\text{H}_2\text{L}^1$  in  $\text{DMSO-}d_6$

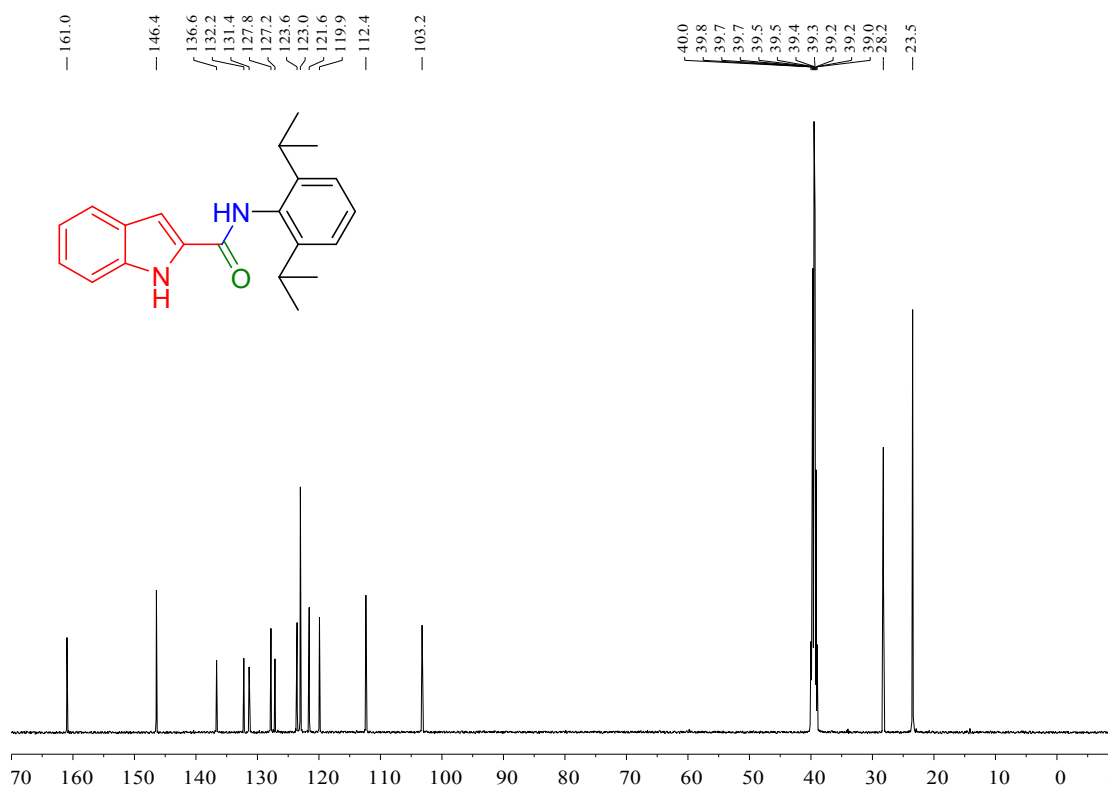

**Figure S2.**  $^{13}\text{C}$  NMR spectrum of pro-ligand  $\text{H}_2\text{L}^1$  in  $\text{DMSO-}d_6$

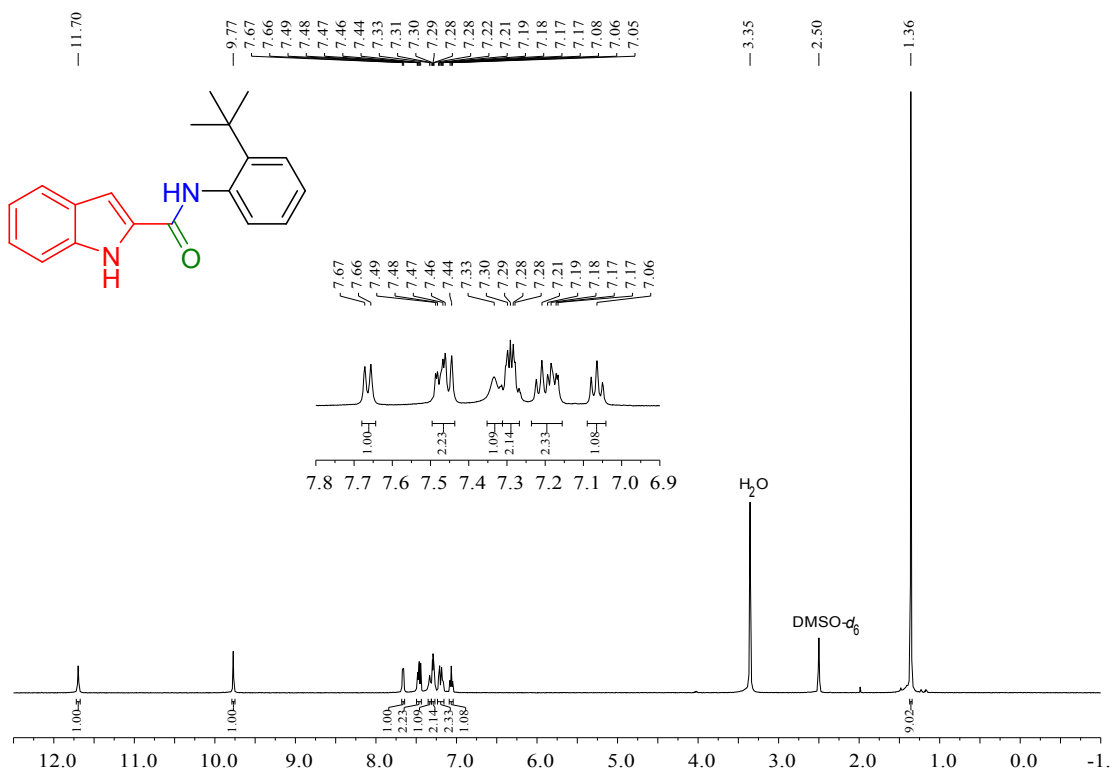

**Figure S3.**  $^1H$  NMR spectrum of pro-ligand  $H_2L^2$  in  $DMSO-d_6$

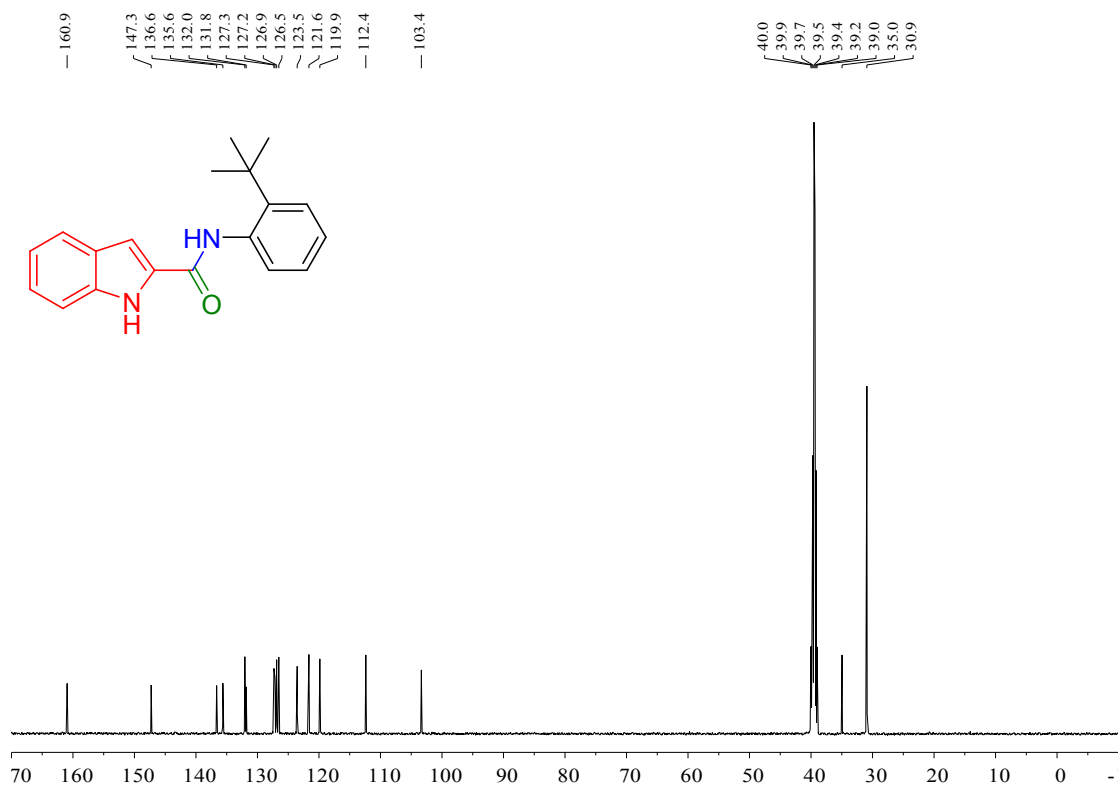

**Figure S4.**  $^{13}C$  NMR spectrum of pro-ligand  $H_2L^2$  in  $DMSO-d_6$

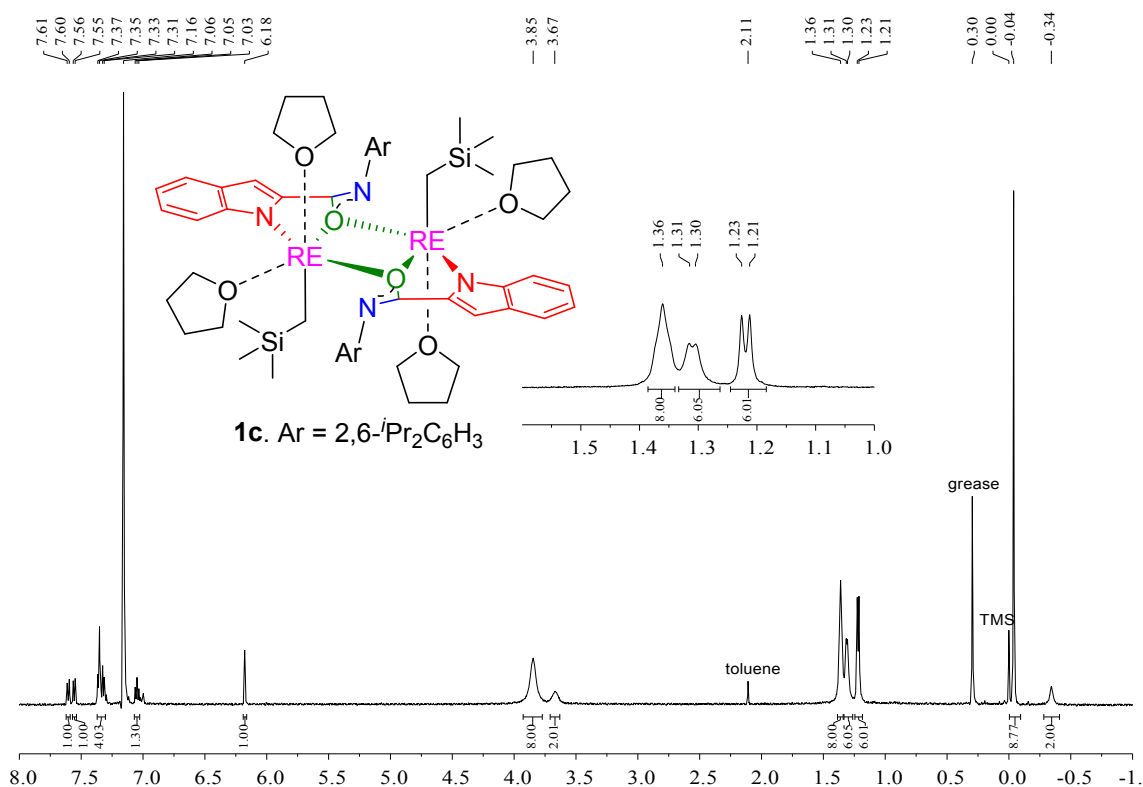

**Figure S5.** <sup>1</sup>H NMR spectrum of complex **1c** in C<sub>6</sub>D<sub>6</sub>

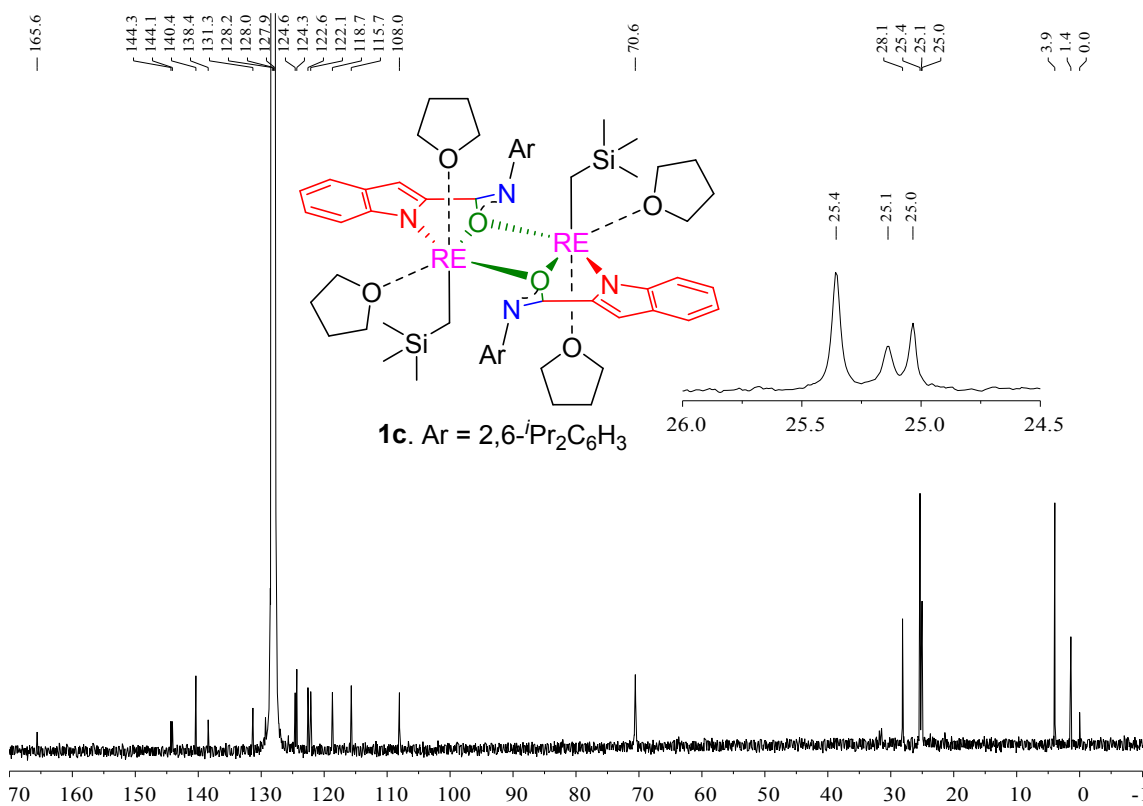

**Figure S6.** <sup>13</sup>C NMR spectrum of complex **1c** in C<sub>6</sub>D<sub>6</sub>

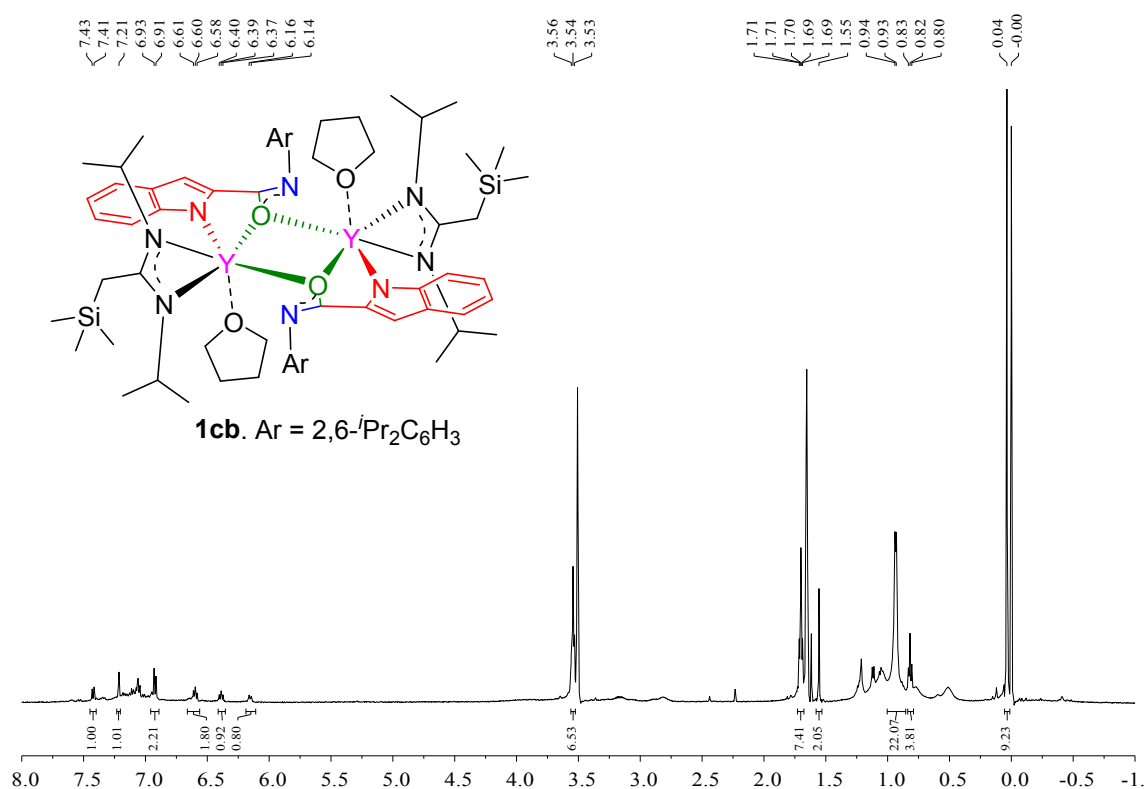

**Figure S7.** <sup>1</sup>H NMR spectrum of complex **1cb** in THF-*d*<sub>8</sub>

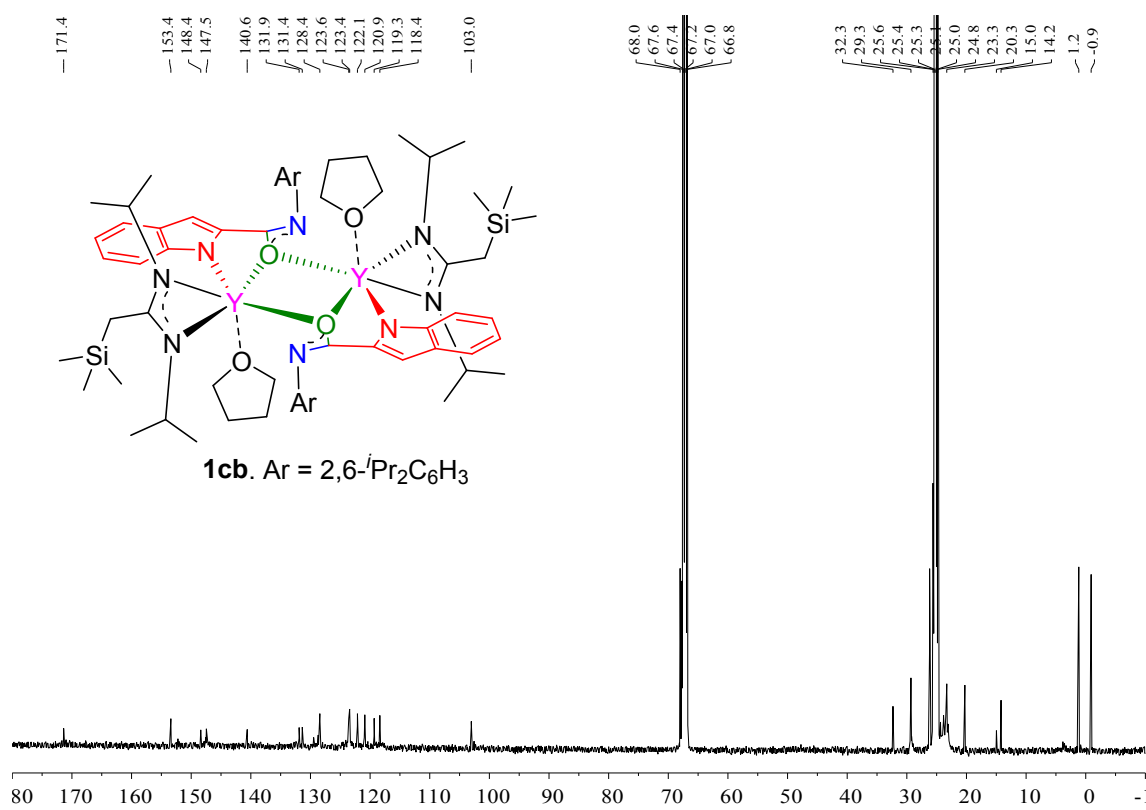

**Figure S8.** <sup>13</sup>C NMR spectrum of complex **1cb** in THF-*d*<sub>8</sub>



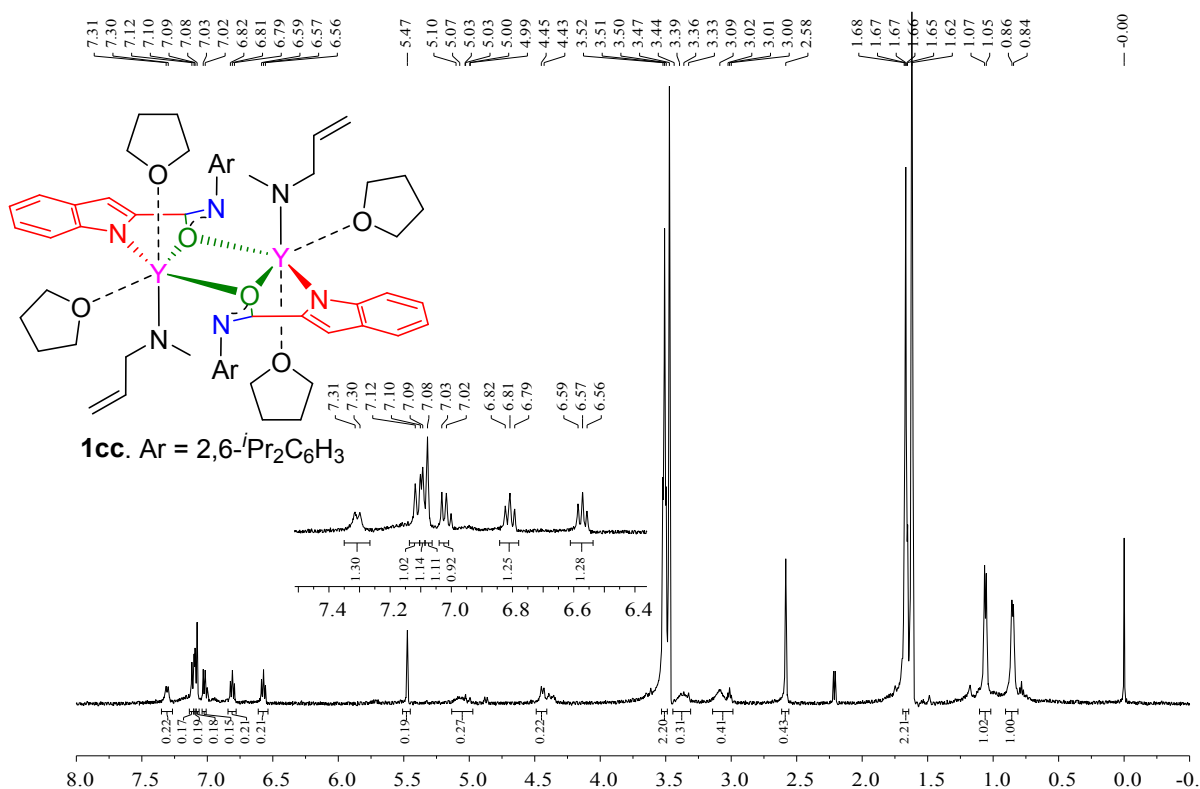

**Figure S9.** <sup>1</sup>H NMR spectrum of complex **1cc** in THF-*d*<sub>8</sub>

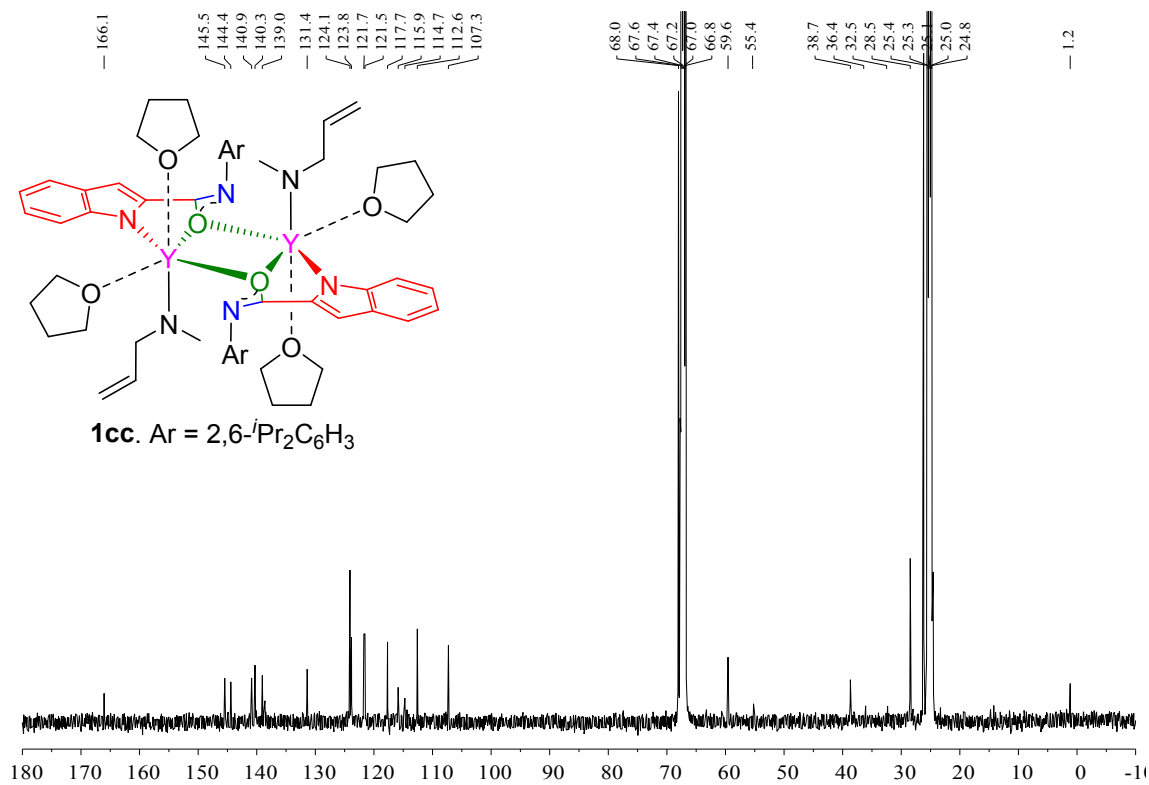

**Figure S10.** <sup>13</sup>C NMR spectrum of complex **1cc** in THF-*d*<sub>8</sub>

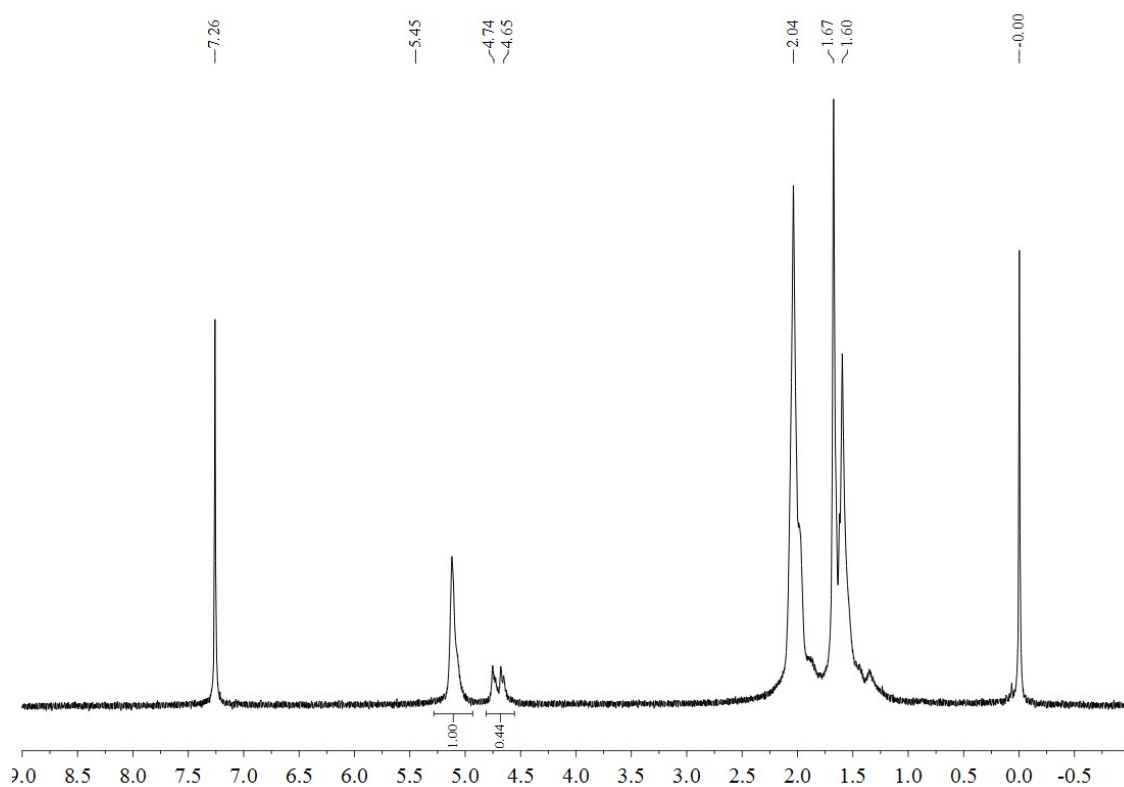

**Figure S11.**  $^1\text{H}$  NMR Spectrum of Polyisoprene for Table 3, Entry 4

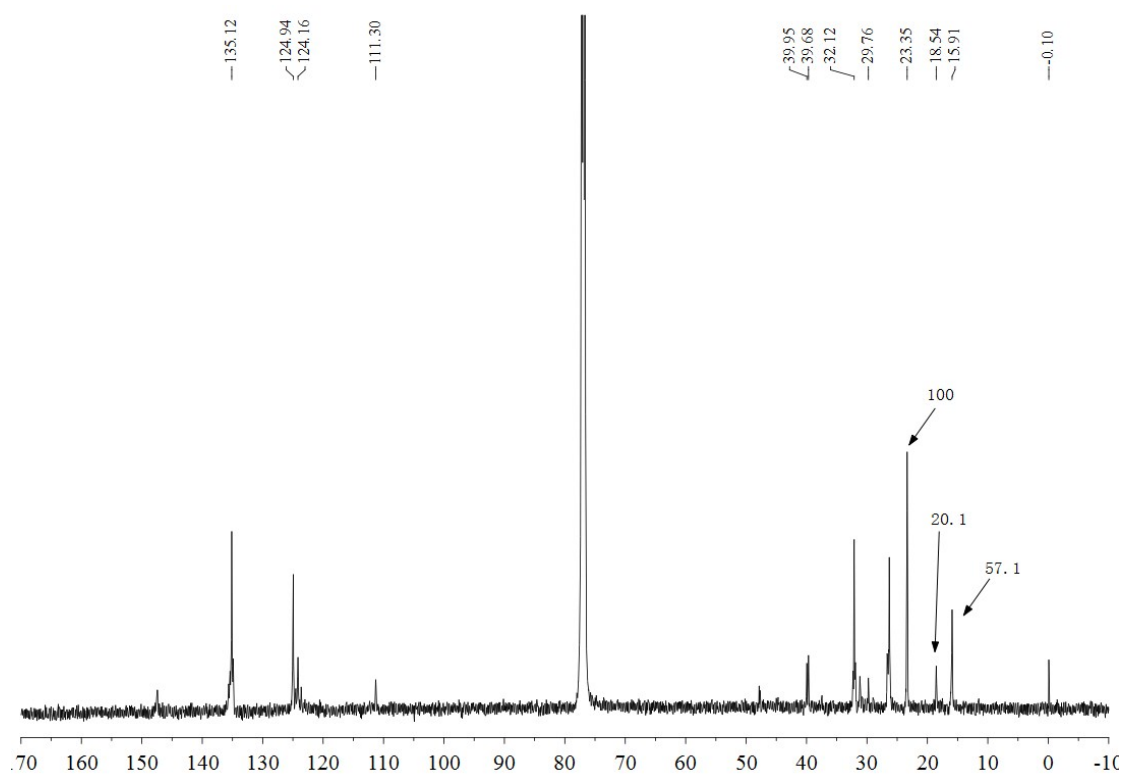

**Figure S12.**  $^{13}\text{C}$ -int NMR Spectrum of Polyisoprene for Table 3, Entry 4

(100 for *cis*-1,4-PIP; 57.1 for *trans*-1,4-PIP; 20.1 for 3,4-PIP)

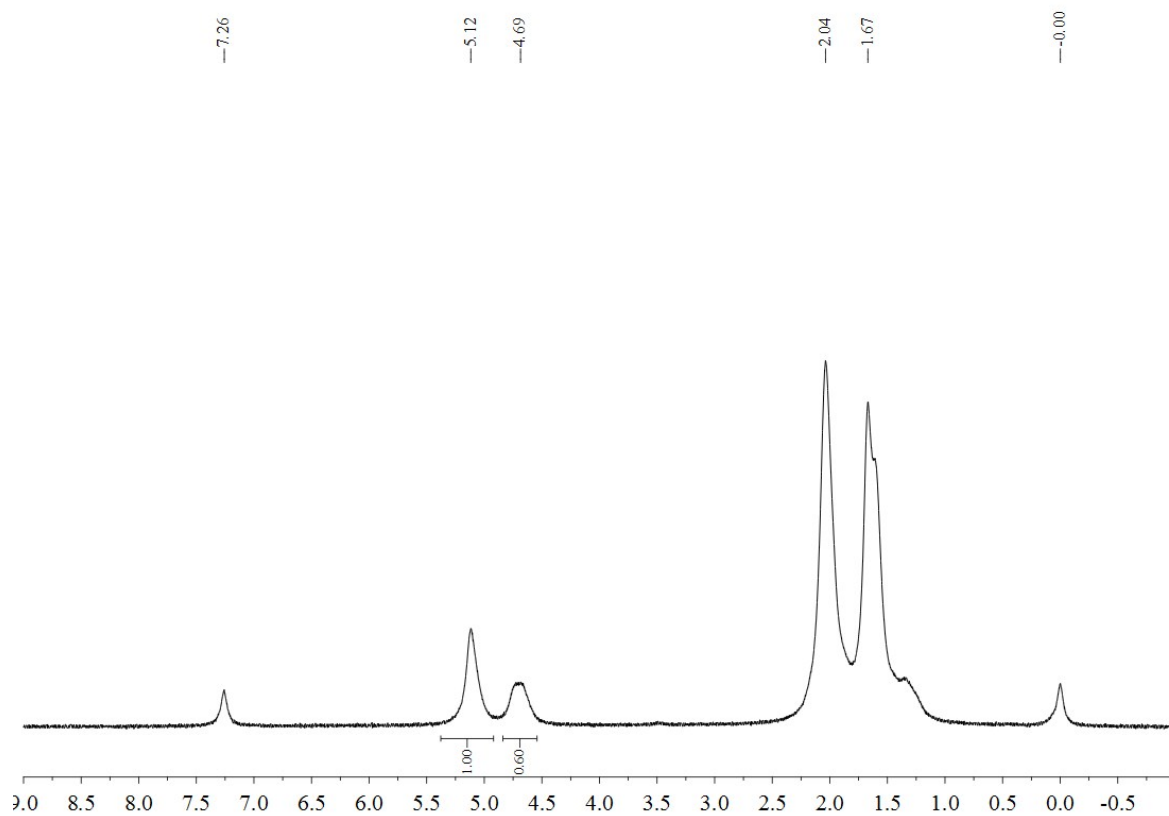

**Figure S13.**  $^1\text{H}$  NMR Spectrum of Polyisoprene for Table 3, Entry 7

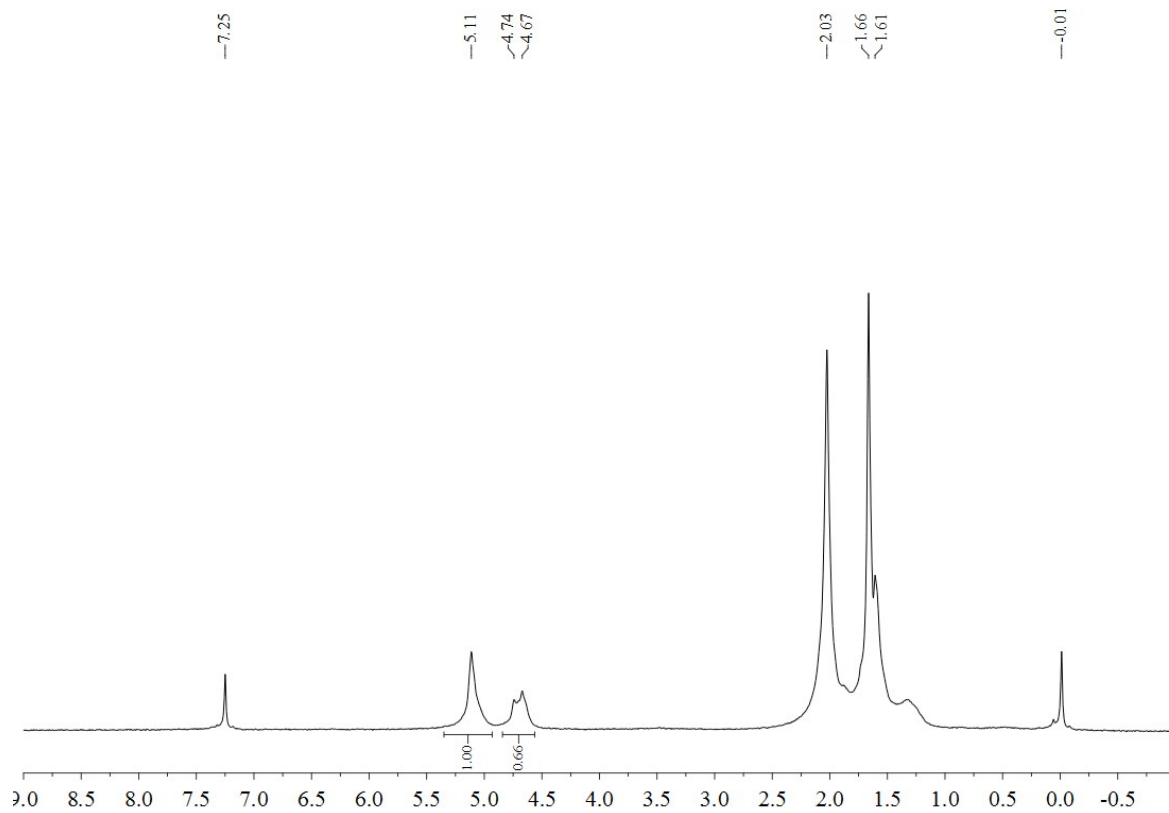

**Figure S14.**  $^1\text{H}$  NMR Spectrum of Polyisoprene for Table 3, Entry 8

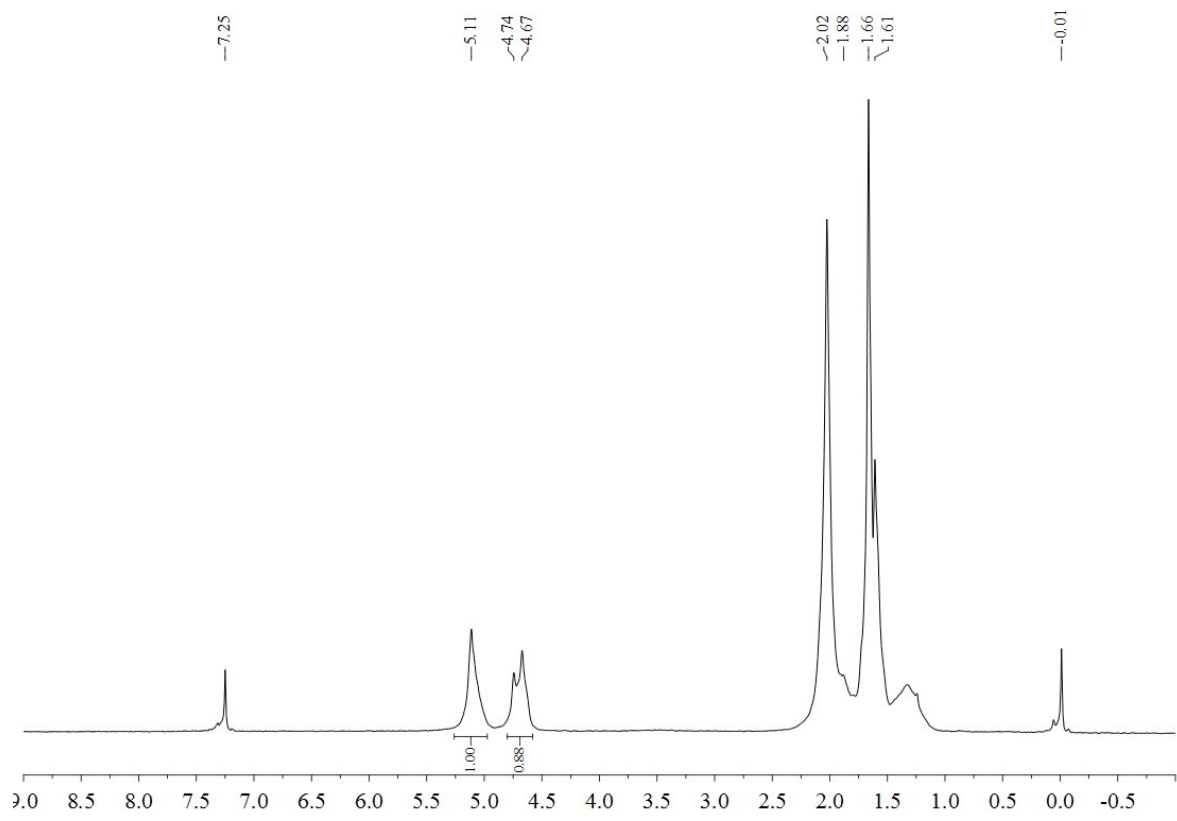

**Figure S15.**  $^1\text{H}$  NMR Spectrum of Polyisoprene for Table 3, Entry 9

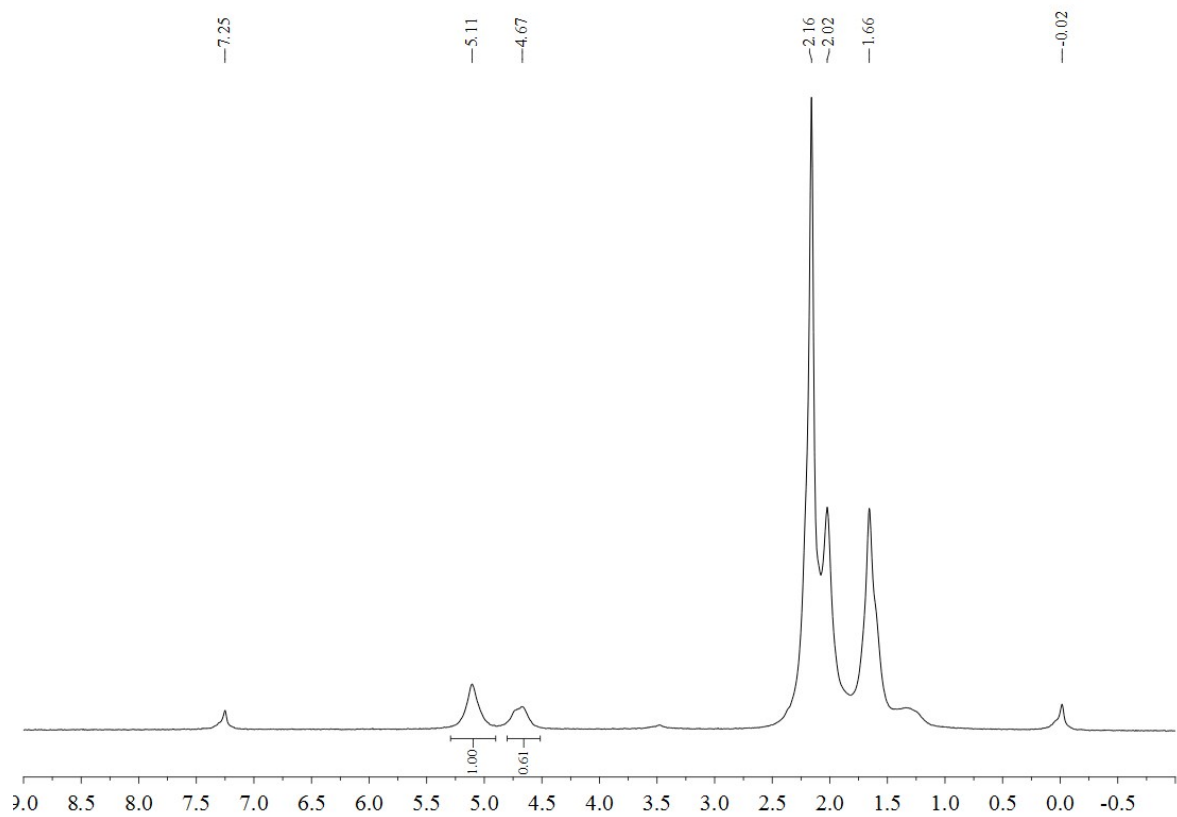

**Figure S16.**  $^1\text{H}$  NMR Spectrum of Polyisoprene for Table 3, Entry 10

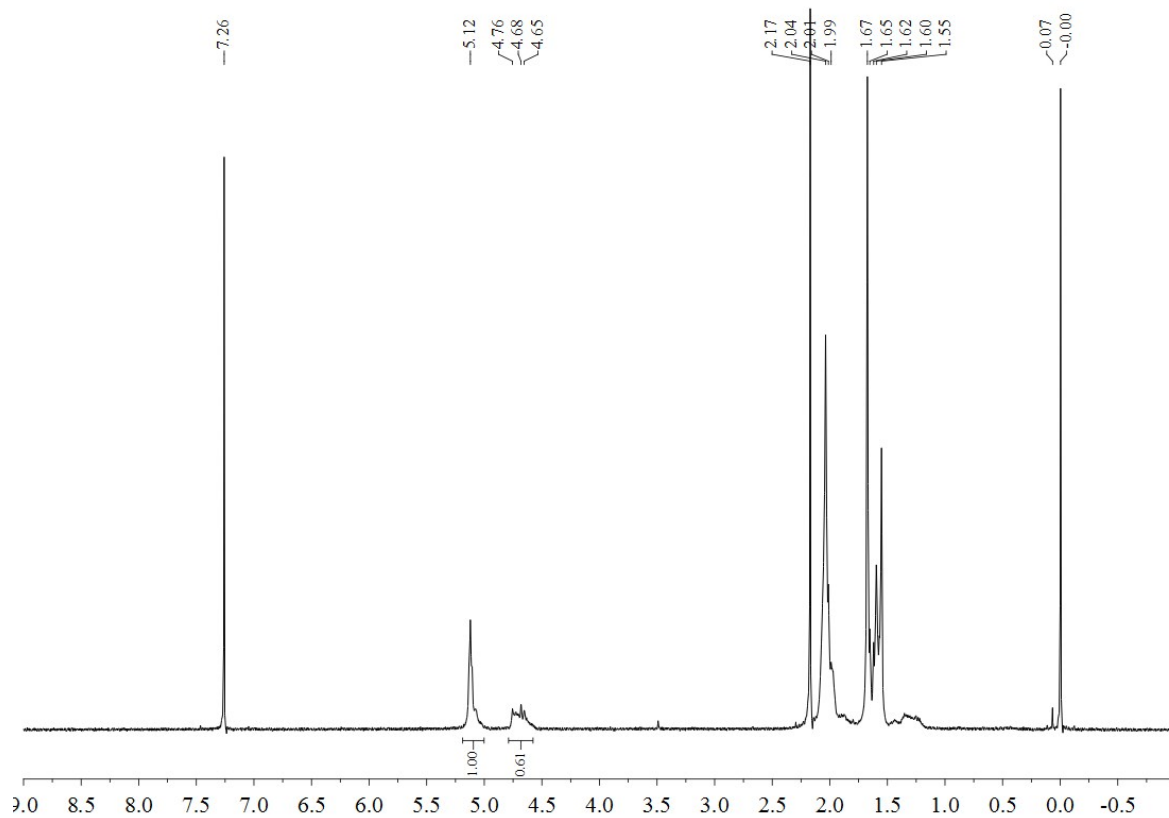

**Figure S17.**  $^1\text{H}$  NMR Spectrum of Polyisoprene for Table 3, Entry 11

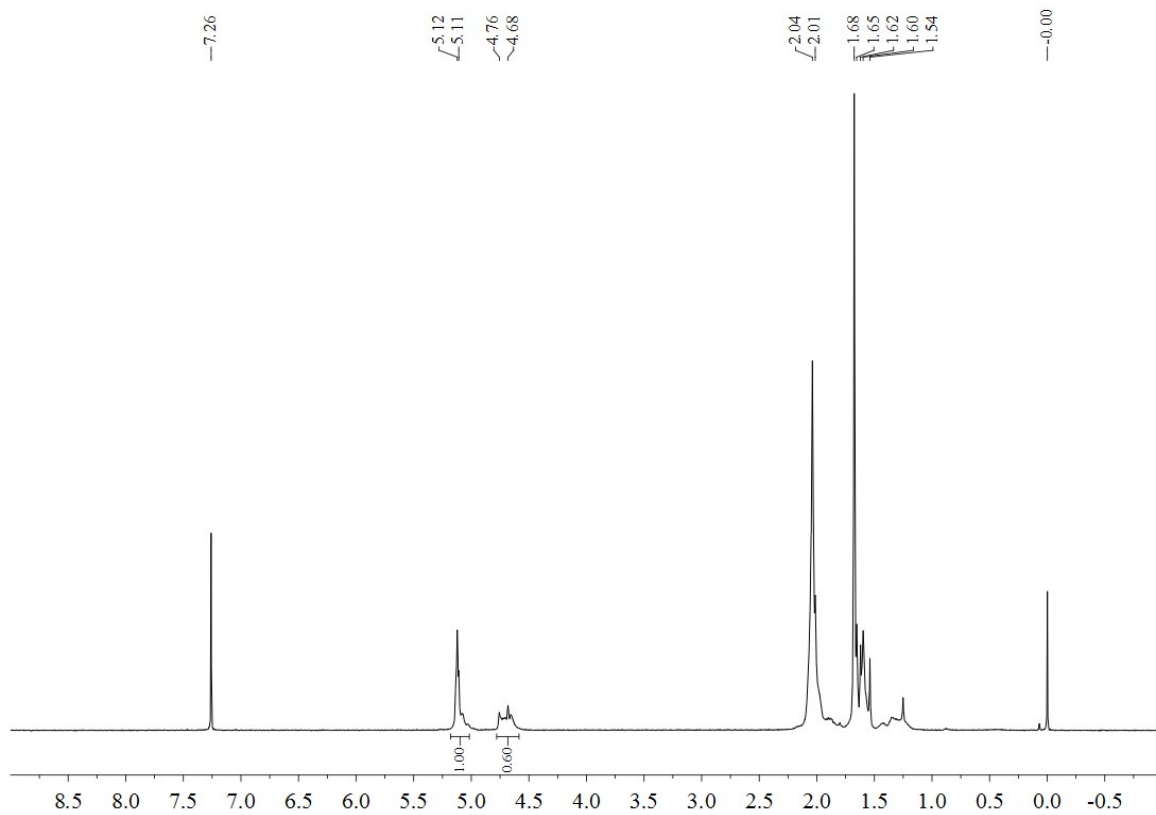

**Figure S18.**  $^1\text{H}$  NMR Spectrum of Polyisoprene for Table 3, Entry 12

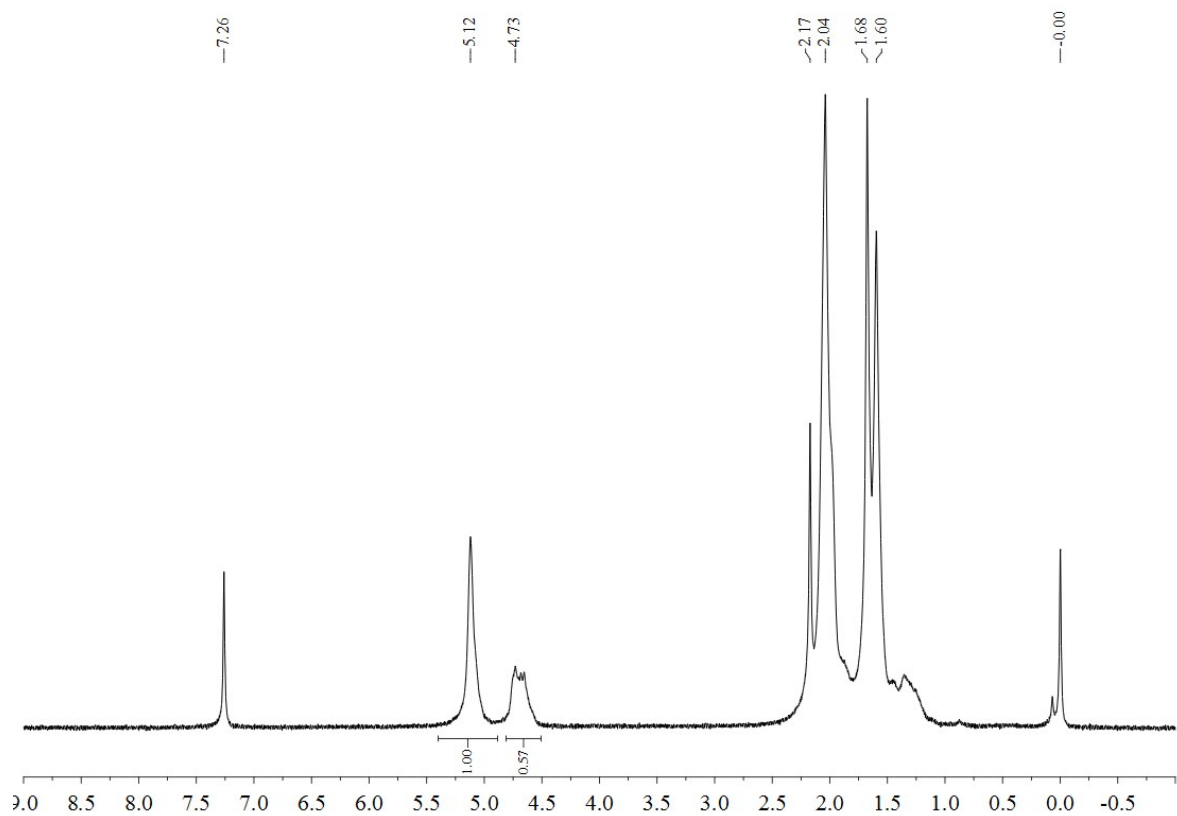

**Figure S19.**  $^1\text{H}$  NMR Spectrum of Polyisoprene for Table 3, Entry 13

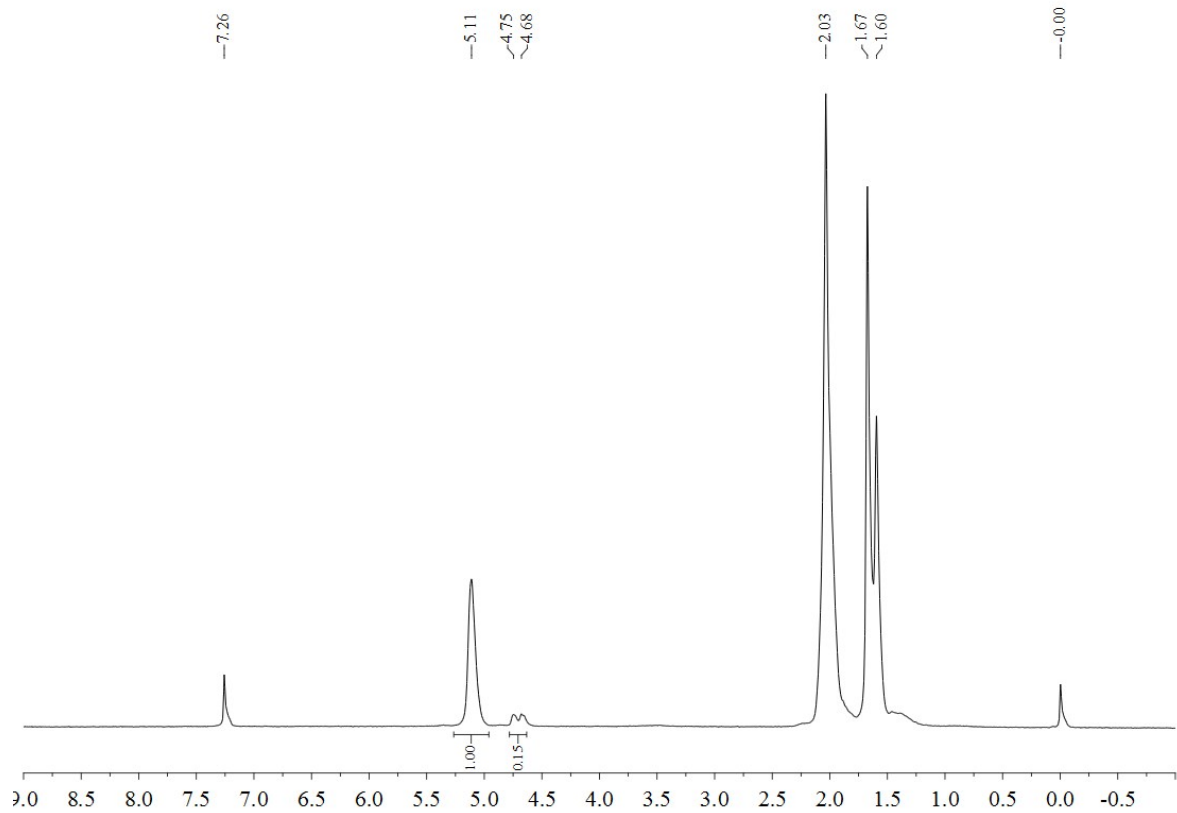

**Figure S20.**  $^1\text{H}$  NMR Spectrum of Polyisoprene for Table 4, Entry 2

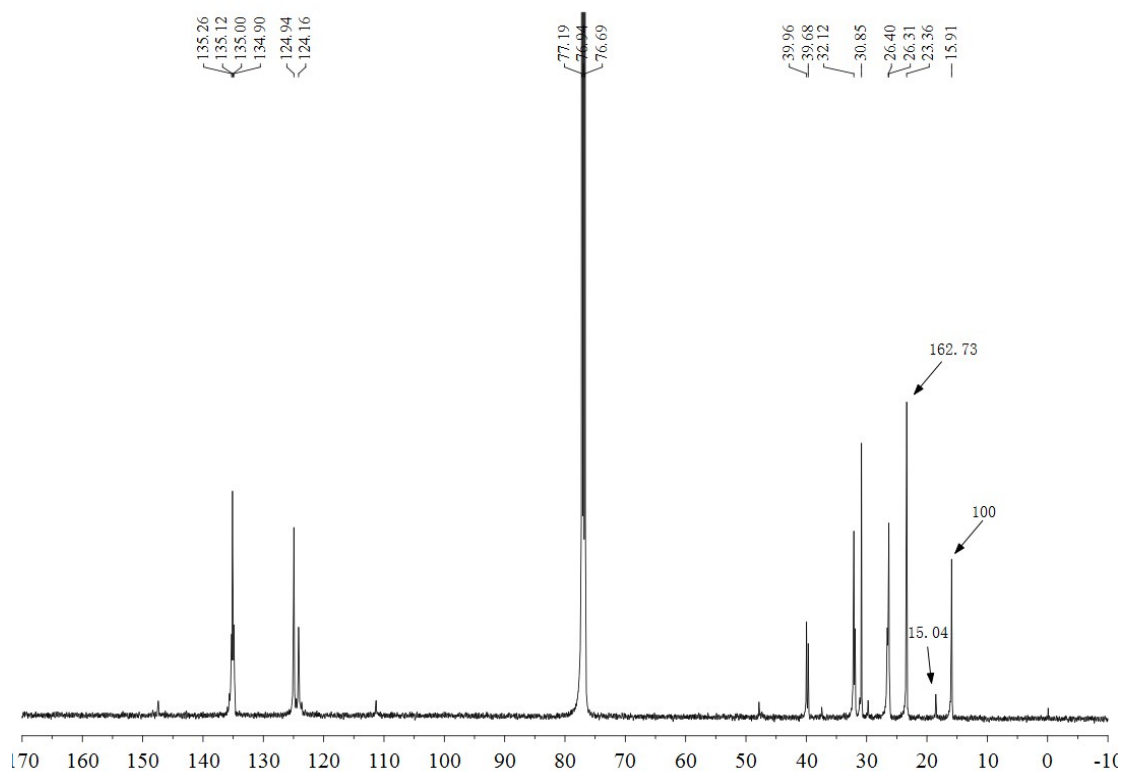

**Figure S21.**  $^{13}\text{C}$ -int NMR Spectrum of Polyisoprene for Table 4, Entry 2

(162.73 for *cis*-1,4-PIP; 100 for *trans*-1,4-PIP; 15.04 for 3,4-PIP)

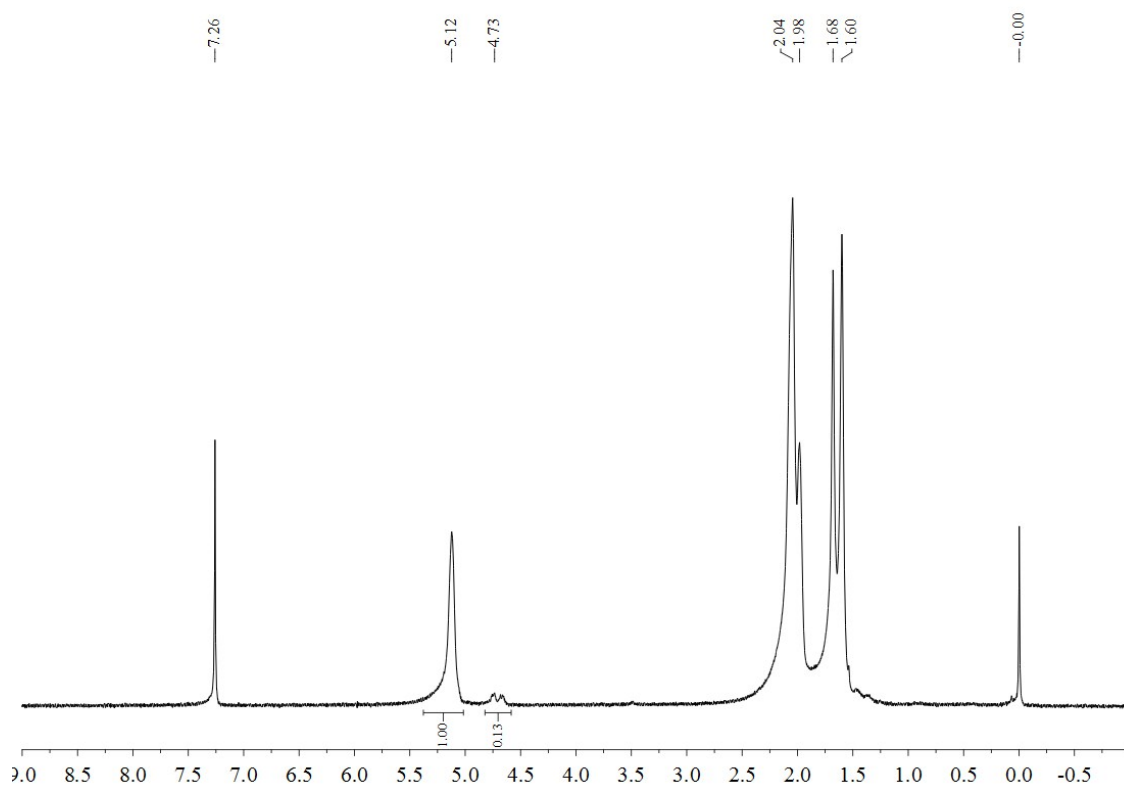

**Figure S22.**  $^1\text{H}$  NMR Spectrum of Polyisoprene for Table 4, Entry 3

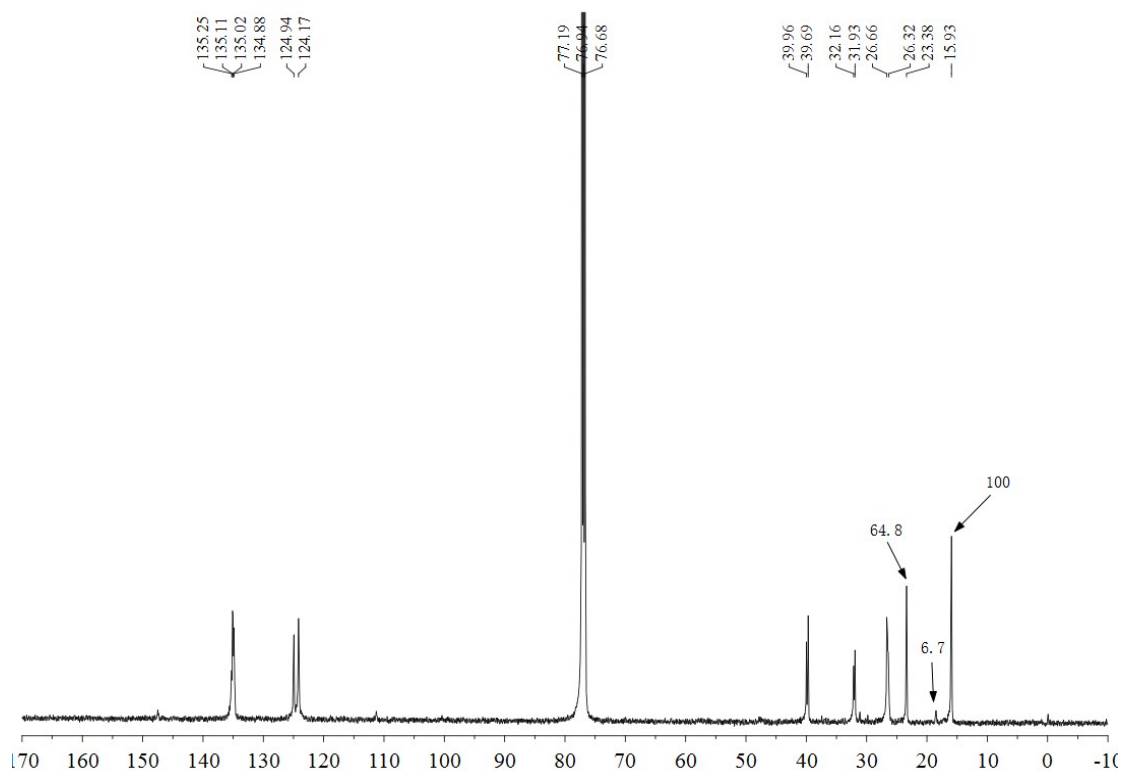

**Figure S23.**  $^{13}\text{C}$ -int NMR Spectrum of Polyisoprene for Table 4, Entry 3

(64.8 for *cis*-1,4-PIP; 100 for *trans*-1,4-PIP; 6.7 for 3,4-PIP)

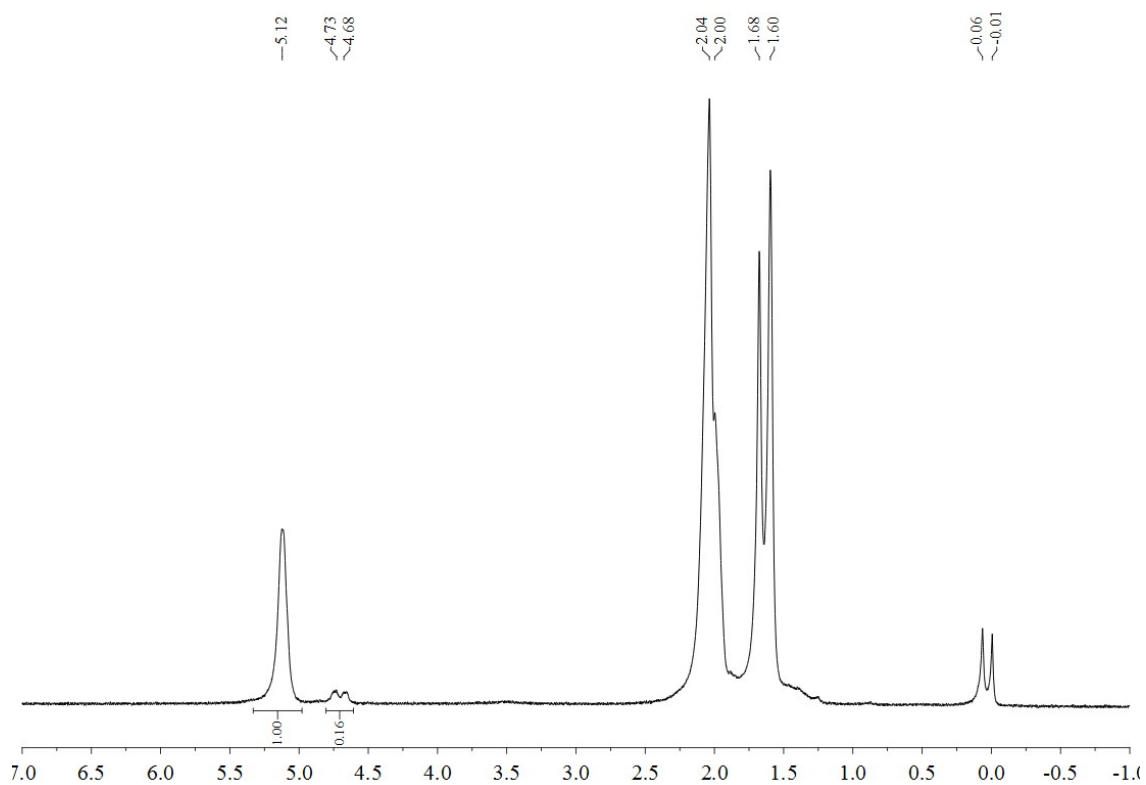

**Figure S24.**  $^1\text{H}$  NMR Spectrum of Polyisoprene for Table 4, Entry 4



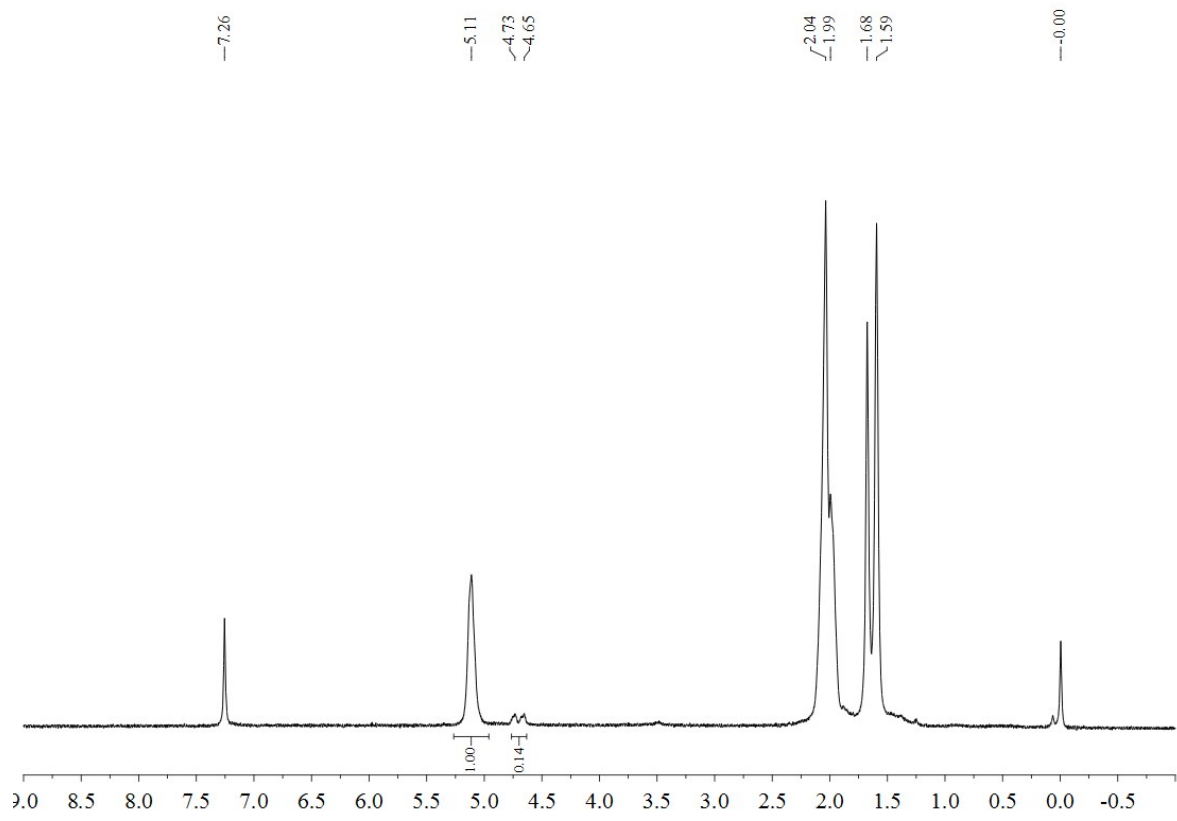

**Figure S25.**  $^1\text{H}$  NMR Spectrum of Polyisoprene for Table 4, Entry 5

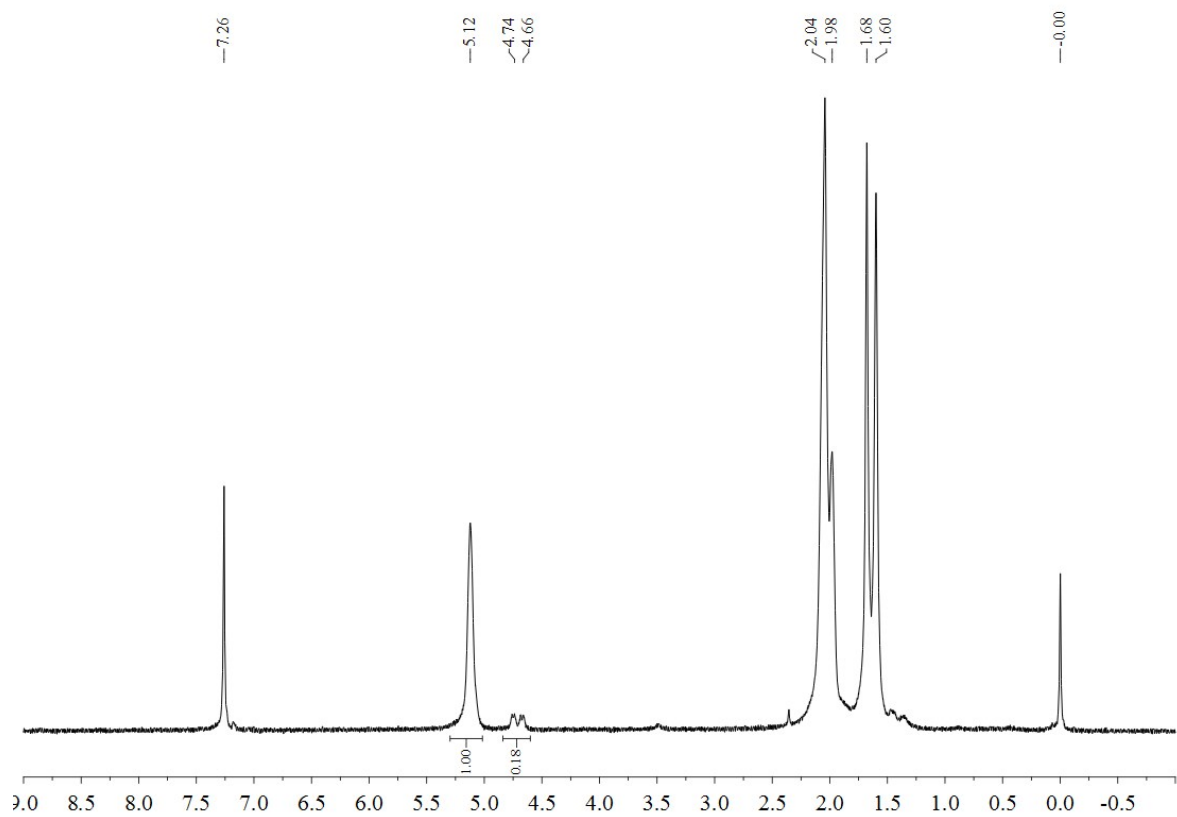

**Figure S26.**  $^1\text{H}$  NMR Spectrum of Polyisoprene for Table 4, Entry 6

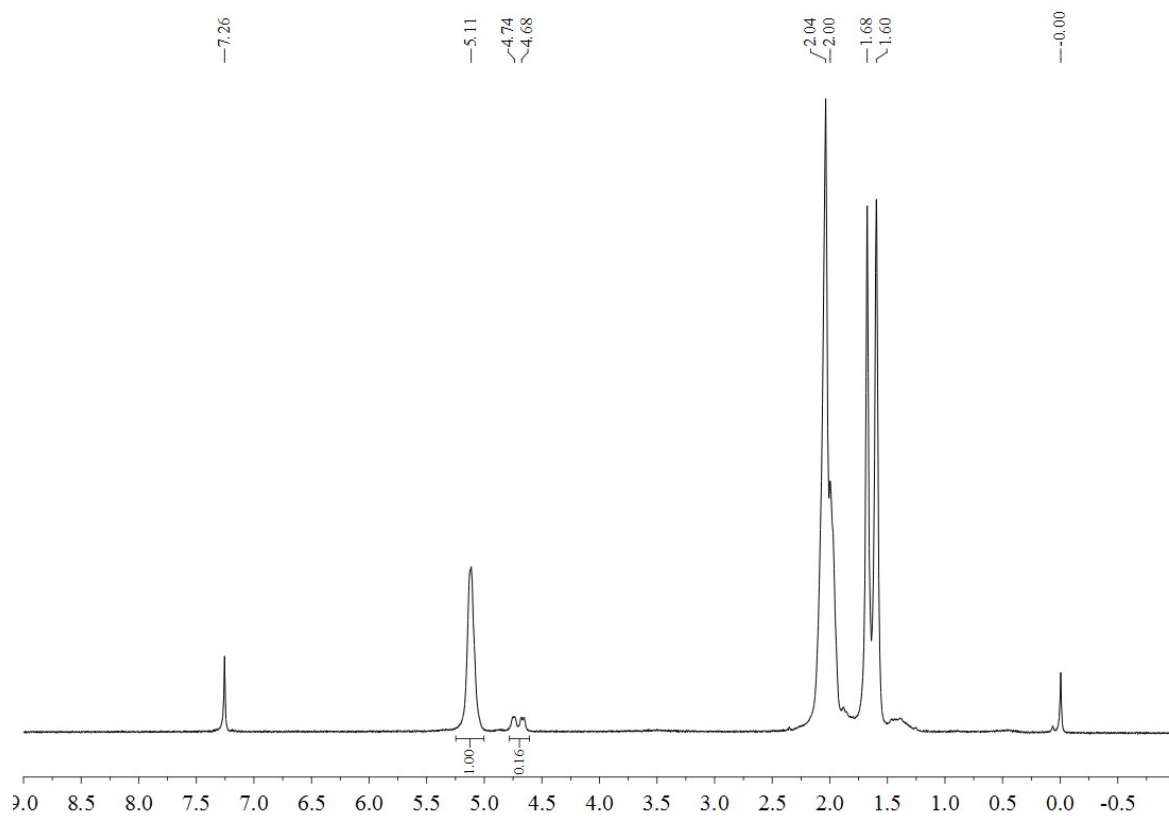

**Figure S27.**  $^1\text{H}$  NMR Spectrum of Polyisoprene for Table 4, Entry 7

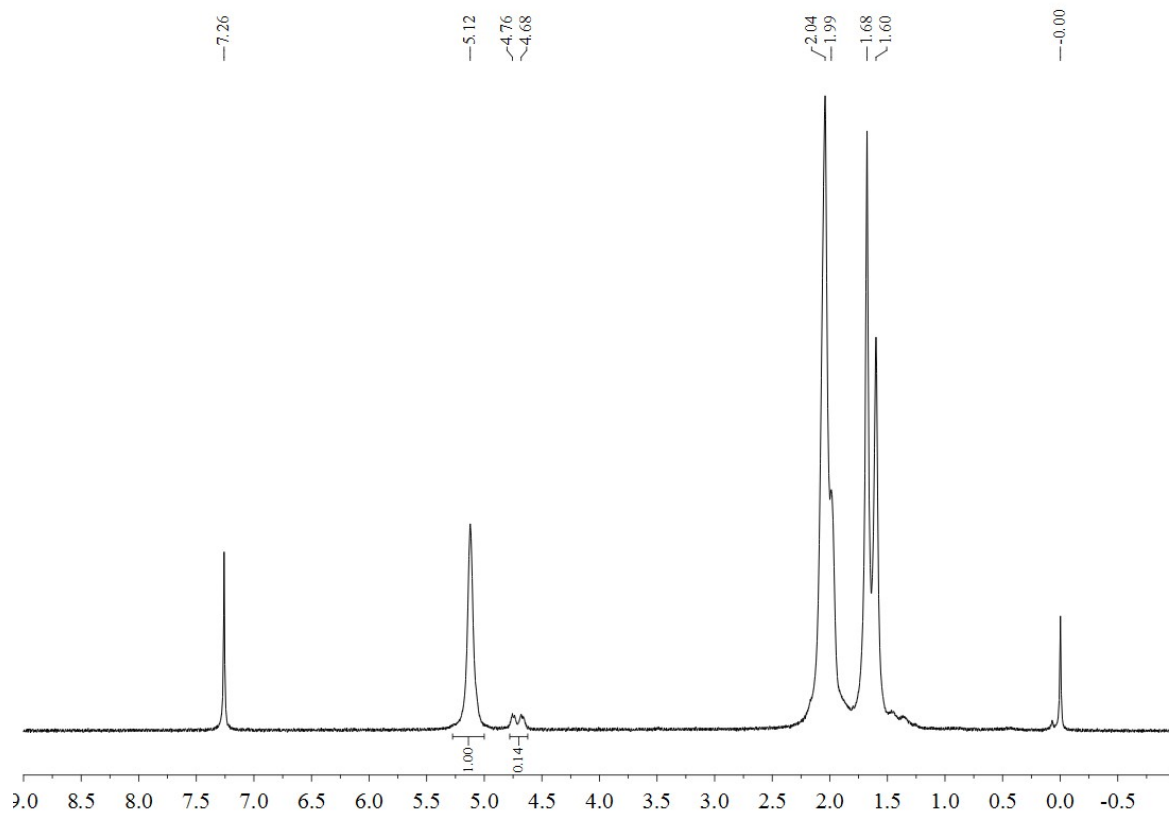

**Figure S28.**  $^1\text{H}$  NMR Spectrum of Polyisoprene for Table 4, Entry 8

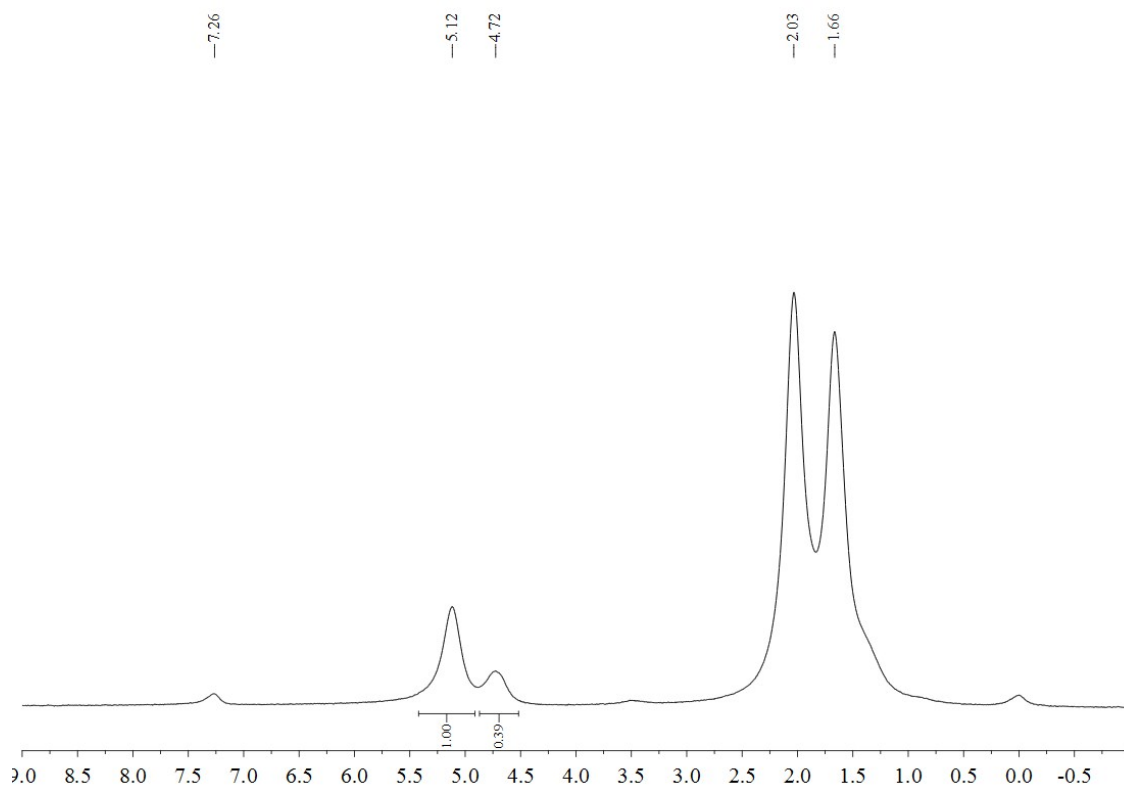

**Figure S29.**  $^1\text{H}$  NMR Spectrum of Polyisoprene for Table 4, Entry 9

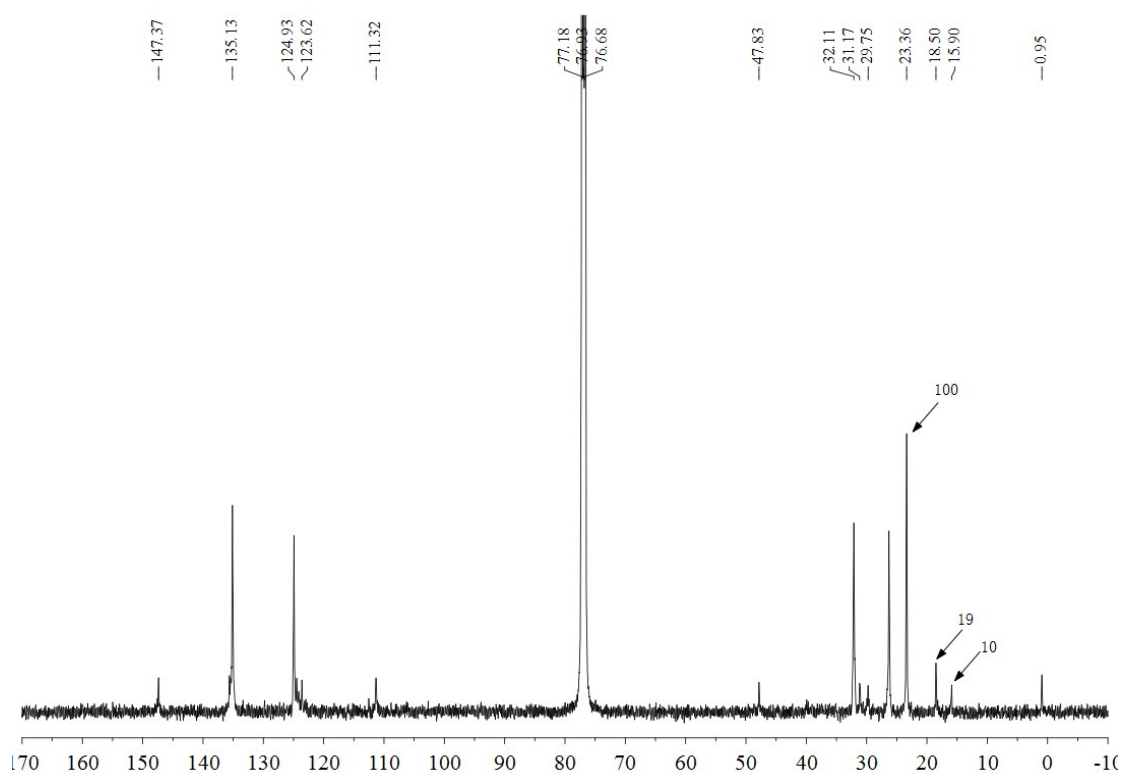

**Figure S30.**  $^{13}\text{C}$ -int NMR Spectrum of Polyisoprene for Table 4, Entry 9

(100 for *cis*-1,4-PIP; 10 for *trans*-1,4-PIP; 19 for 3,4-PIP)

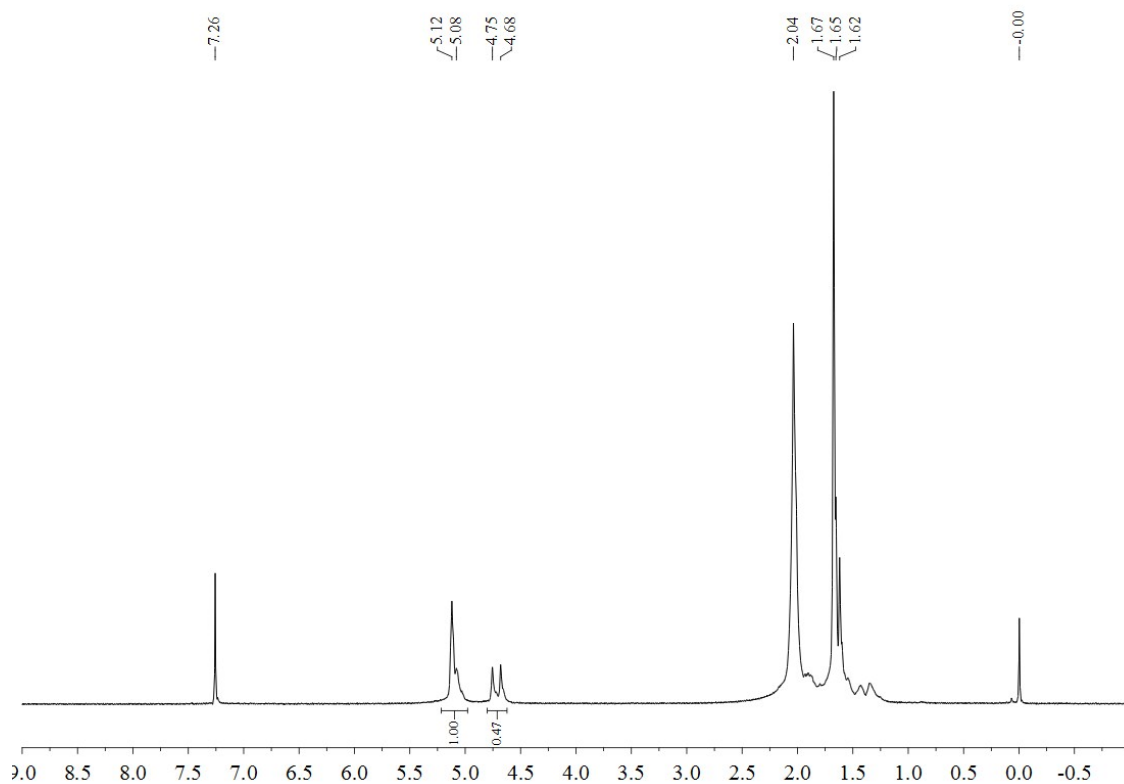

**Figure S31.**  $^1\text{H}$  NMR Spectrum of Polyisoprene for Table 4, Entry 17

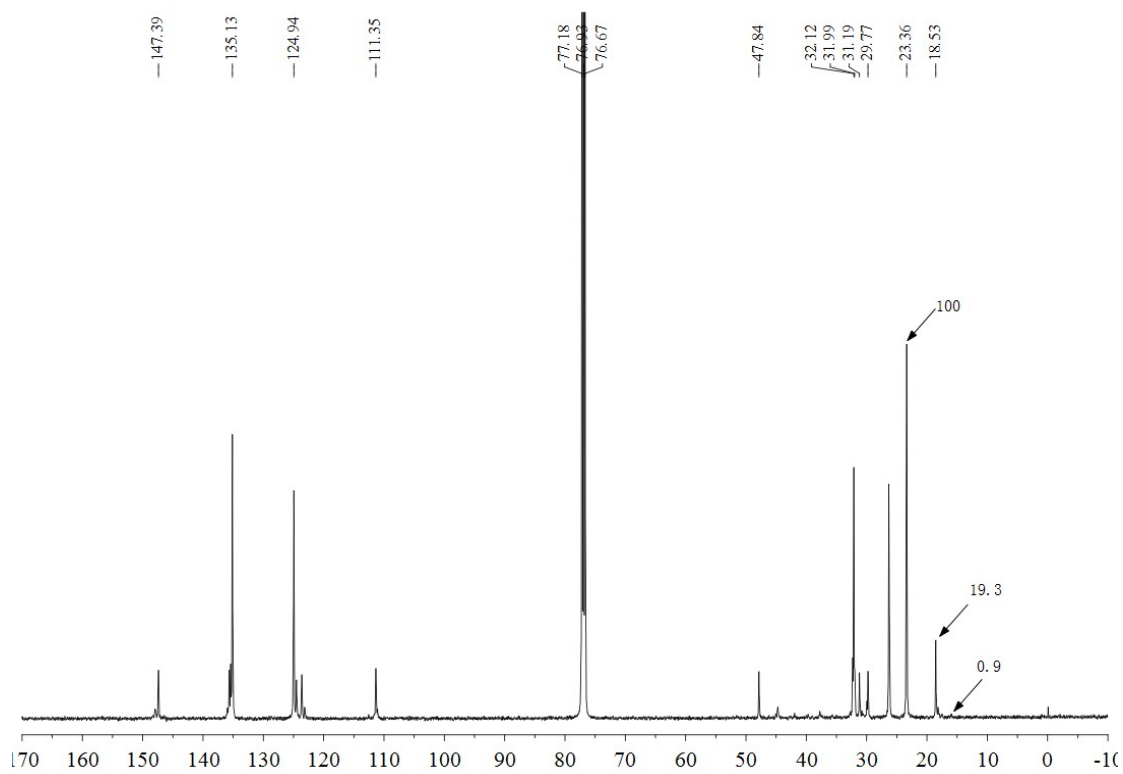

**Figure S32.**  $^{13}\text{C}$ -int NMR Spectrum of Polyisoprene for Table 4, Entry 17

(100 for *cis*-1,4-PIP; 0.9 for *trans*-1,4-PIP; 19.3 for 3,4-PIP)

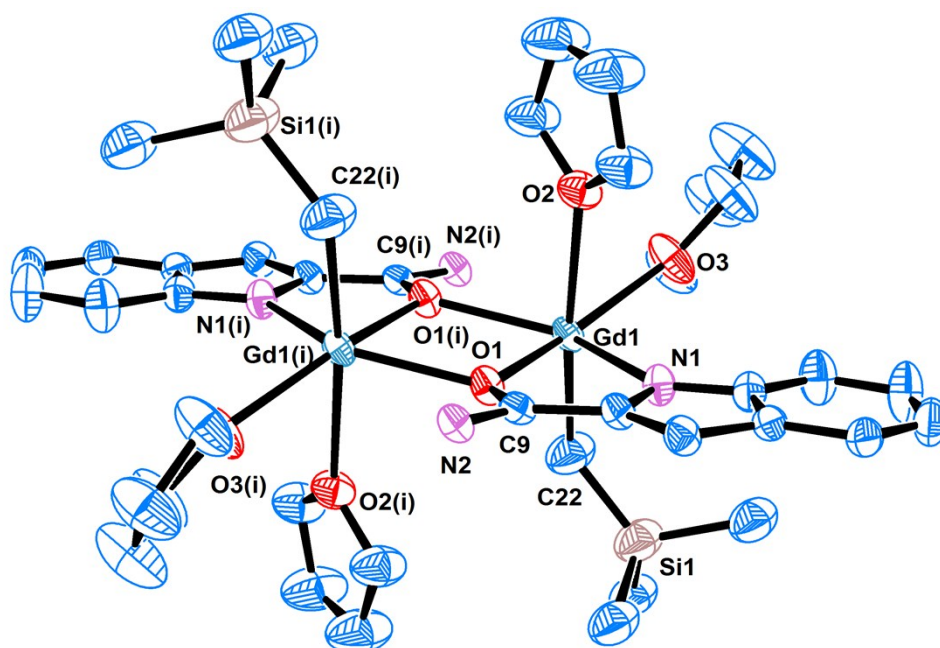

**Figure S33.** Single-crystal structure of the complex **1a** with thermal ellipsoids at the 30% level, all hydrogen atoms and Dipp on N2 and N2(i) are omitted for clarity. Selected bond lengths (Å) and angles (°): Gd1-C22 2.416(7), Gd1-O1 2.298(3), Gd1-N1 2.410(4), O1-Gd1-N1 66.59(12).

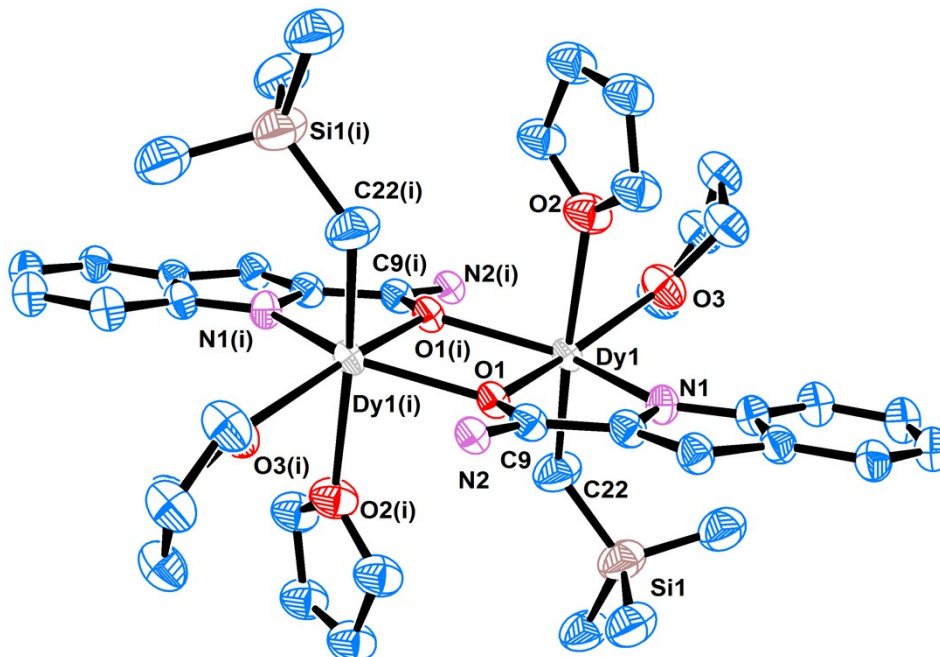

**Figure S34.** Single-crystal structure of the complex **1b** with thermal ellipsoids at the 30% level, all hydrogen atoms and Dipp on N2 and N2(i) are omitted for clarity. Selected bond lengths (Å) and angles (°): Dy1-C22 2.388(8), Dy1-O1 2.284(3), Dy1-N1 2.371(4), O1-Dy1-N1 67.23(13).

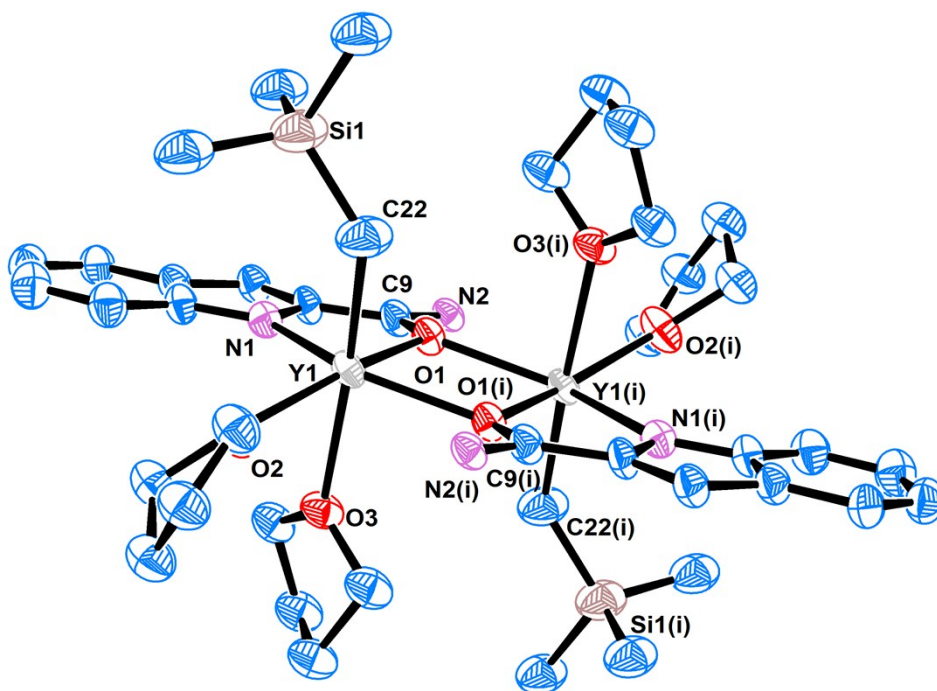

**Figure S35.** Single-crystal structure of the complex **1c** with thermal ellipsoids at the 30% level, all hydrogen atoms and Dipp on N2 and N2(i) are omitted for clarity. Selected bond lengths (Å) and angles (°): Y1-C22 2.376(6), Y1-O1 2.269(4), Y1-N1 2.367(6), O1-Y1-N1 67.97(17).

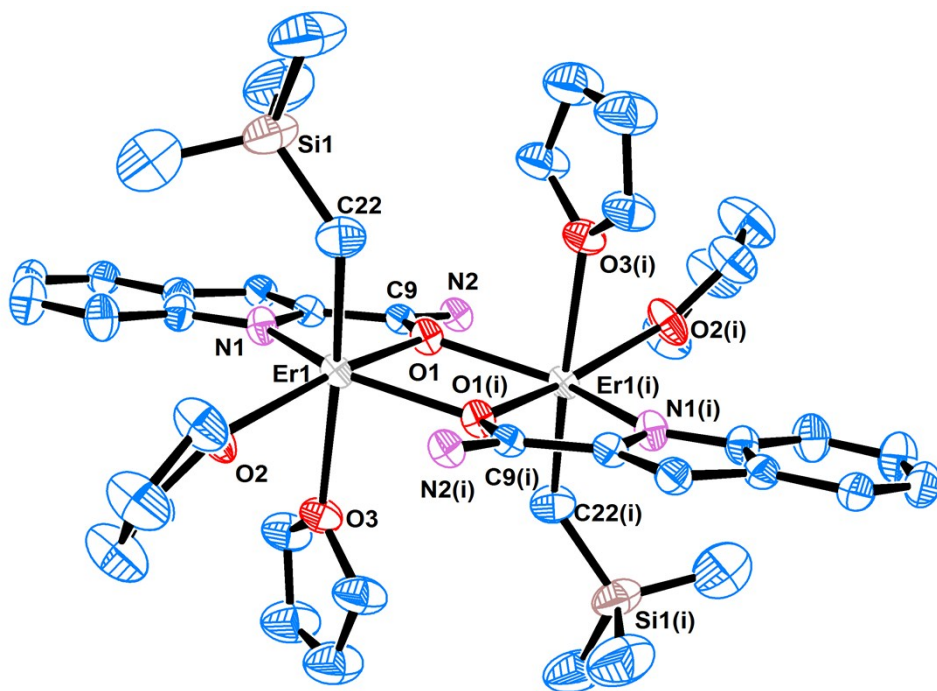

**Figure S36.** Single-crystal structure of the complex **1d** with thermal ellipsoids at the 30% level, all hydrogen atoms and Dipp on N2 and N2(i) are omitted for clarity. Selected bond lengths (Å) and angles (°): Er1-C22 2.367(7), Er1-O1 2.259(3), Er1-N1 2.331(5), O1-Er1-N1 68.61(15).

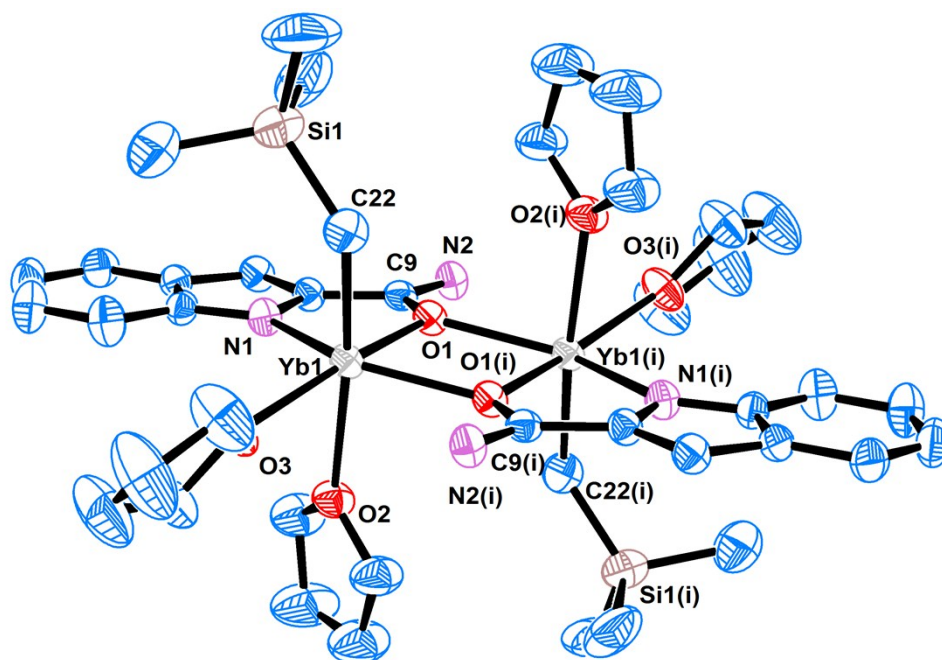

**Figure S37.** Single-crystal structure of the complex **1e** with thermal ellipsoids at the 30% level, all hydrogen atoms and Dipp on N2 and N2(i) are omitted for clarity. Selected bond lengths (Å) and angles (°): Yb1-C22 2.326(5), Yb1-O1 2.237(2), Yb1-N1 2.315(3), O1-Yb1-N1 70.02(10).

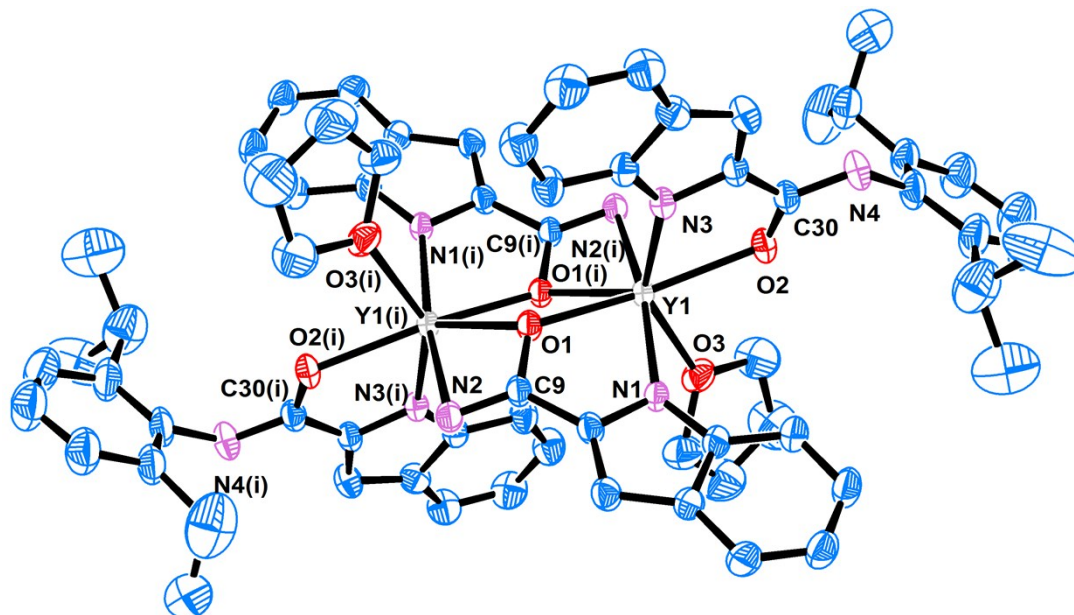

**Figure S38.** Single-crystal structure of the complex **1ca** with thermal ellipsoids at the 30% level, all hydrogen atoms and Dipp on N2 and N2(i) are omitted for clarity. Selected bond lengths (Å) and angles (°): Y1-N1 2.345(3), Y1-O1 2.307(2), Y1-N3 2.340(3), Y1-O2 2.332(3), N1-Y1-O1 67.94(9), N3-Y1-O2 70.05(11).

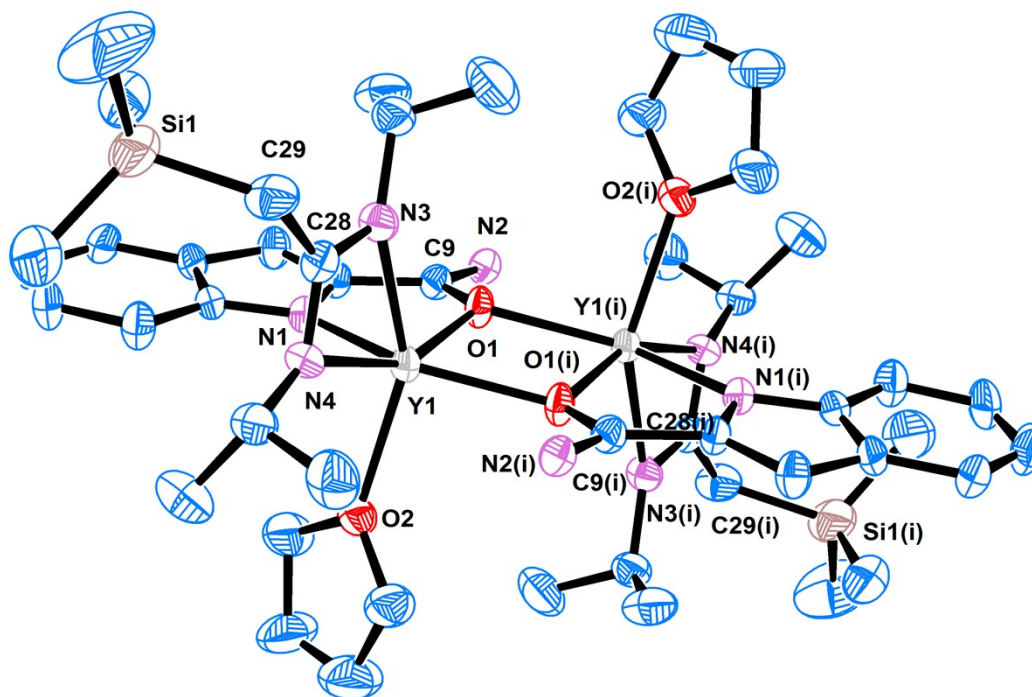

**Figure S39.** Single-crystal structure of the complex **1cb** with thermal ellipsoids at the 30% level, all hydrogen atoms and Dipp on N2 and N2(i) are omitted for clarity. Selected bond lengths (Å) and angles (°): Y1-N1 2.340(4), Y1-O1 2.298(3), Y1-N3 2.293(4), Y1-N4 2.345(4), O1-Y1-N1 67.52(13), N3-Y1-N4 57.67(15).

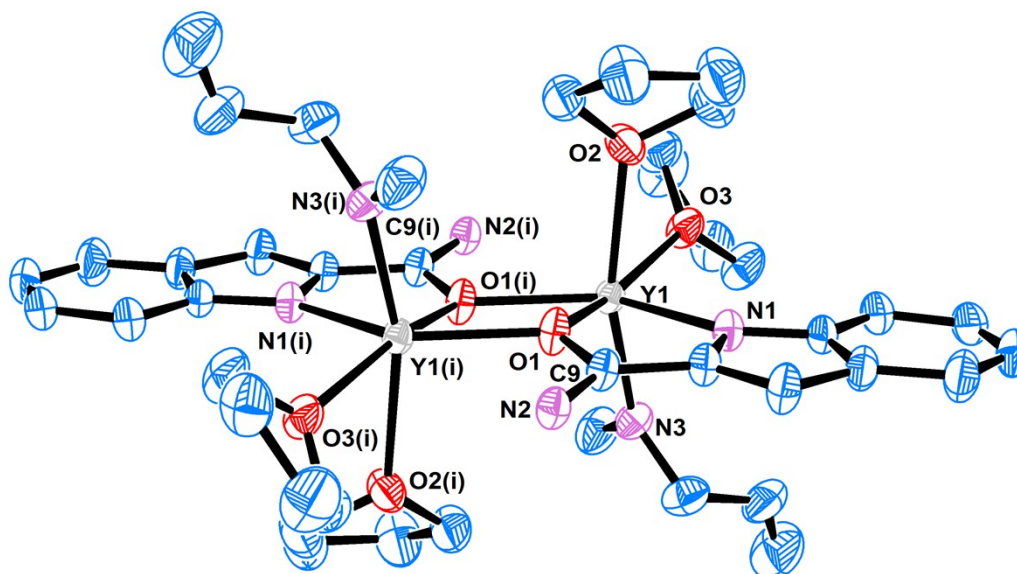

**Figure S40.** Single-crystal structure of the complex **1cc** with thermal ellipsoids at the 30% level, all hydrogen atoms and Dipp on N2 and N2(i) are omitted for clarity. Selected bond lengths (Å) and angles (°): Y1-N1 2.396(2), Y1-O1 2.2874(17), Y1-N3 2.171(2), N1-Y1-O1 67.07(7).



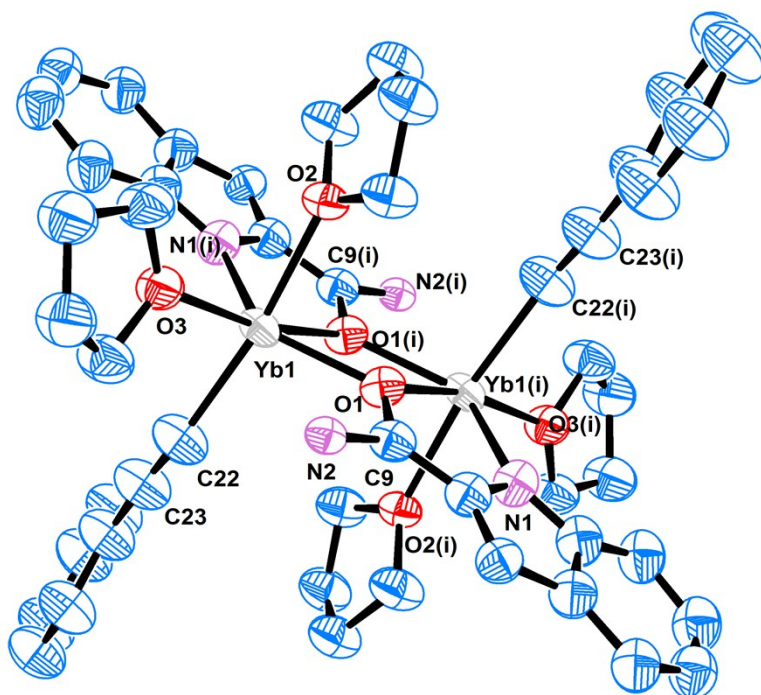

**Figure S41.** Single-crystal structure of the complex **1ea** with thermal ellipsoids at the 30% level, all hydrogen atoms and Dipp on N2 and N2(i) are omitted for clarity. Selected bond lengths (Å) and angles (°): Yb1-N1(i) 2.326(9), Yb1-O1(i) 2.251(6), Yb1-C22 2.314(12), C22-C23 1.192(14), O1(i)-Yb1-N1(i) 68.9(3).

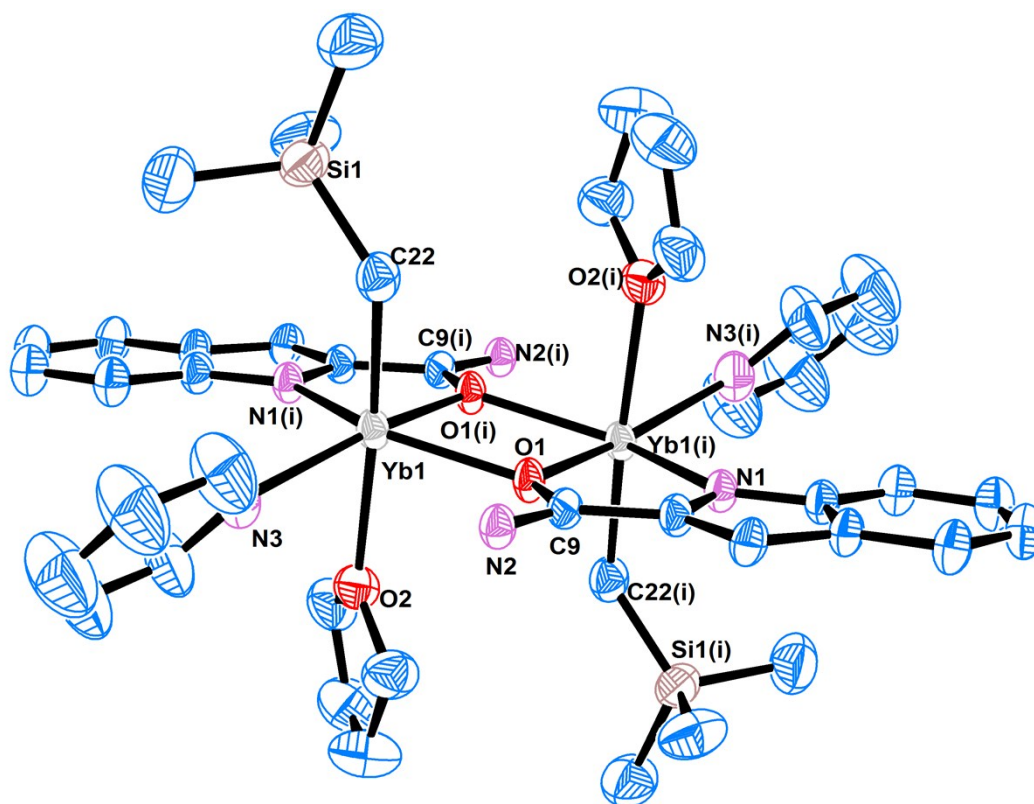

**Figure S42.** Single-crystal structure of the complex **1eb** with thermal ellipsoids at the 30% level, all hydrogen atoms and Dipp on N2 and N2(i) are omitted for clarity. Selected bond lengths (Å) and angles (°): Yb1-N1(i) 2.310(3), Yb1-O1(i) 2.236(3), Yb1-N3 2.394(3), N1(i)-Yb1-O1(i) 69.75(11).

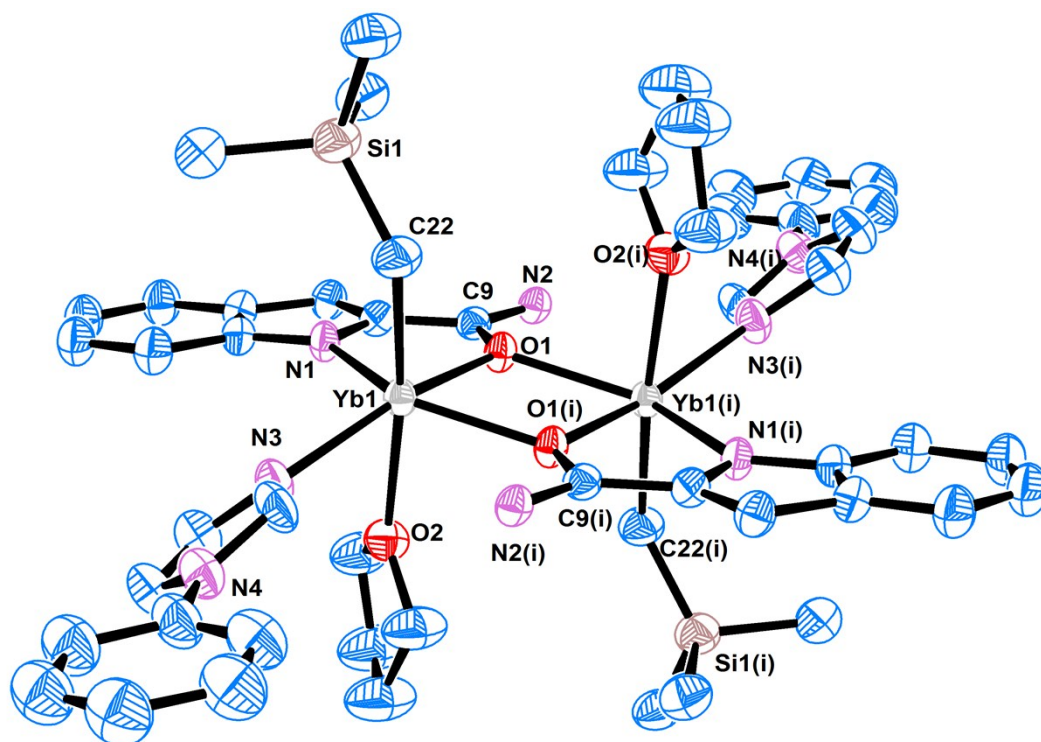

**Figure S43.** Single-crystal structure of the complex **1ec** with thermal ellipsoids at the 30% level, all hydrogen atoms and Dipp on N2 and N2(i) are omitted for clarity. Selected bond lengths (Å) and angles (°): Yb1-N1 2.310(5), Yb1-O1 2.241(4), Yb1-N3 2.419(6), O1-Yb1-N1 69.66(16).

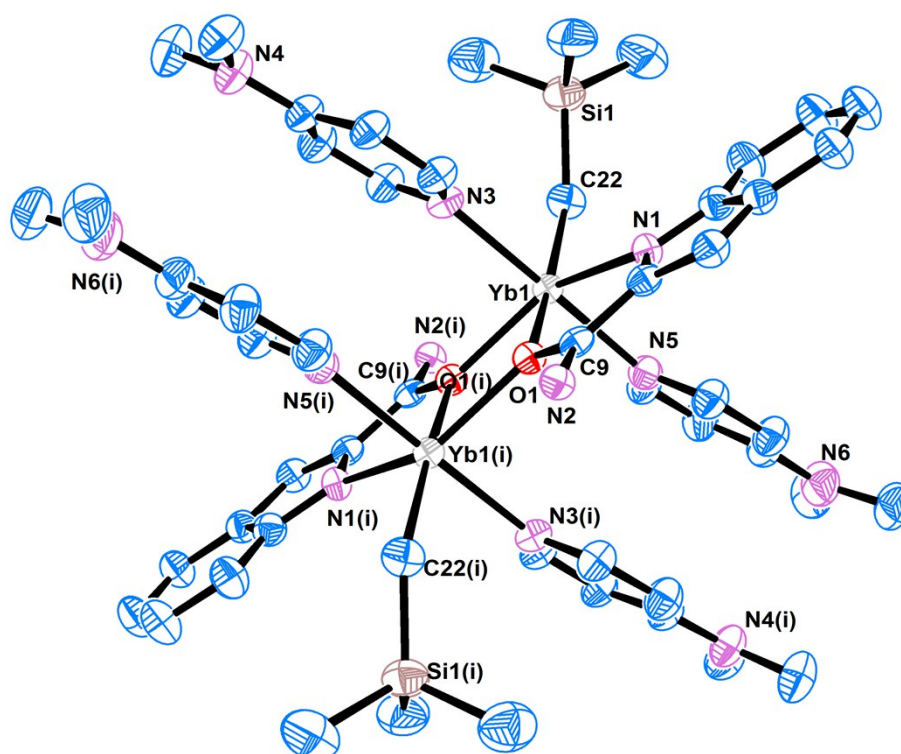

**Figure S44.** Single-crystal structure of the complex **1ed** with thermal ellipsoids at the 30% level, all hydrogen atoms and Dipp on N2 and N2(i) are omitted for clarity. Selected bond lengths (Å) and angles (°): Yb1-N1 2.307(4), Yb1-O1 2.339(4), Yb1-N3 2.405(5), Yb1-N5 2.392(5), Yb1-C22 2.362(7), O1-Yb1-N1 68.66(14).

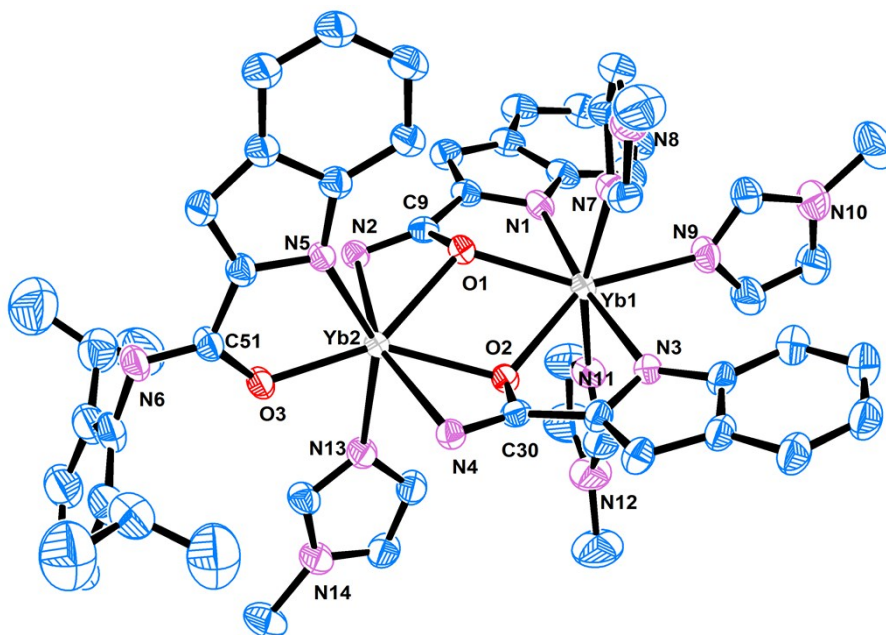

**Figure S45.** Single-crystal structure of the complex **1ee** with thermal ellipsoids at the 30% level, all hydrogen atoms and Dipp on N(2) and N(4) are omitted for clarity. Selected bond lengths (Å) and angles (°): Yb1-N1 2.413(4), Yb1-O1 2.281(3), Yb1-N3 2.416(4), Yb1-O2 2.266(3), Yb1-N7 2.390(4), Yb1-N9 2.424(4), Yb1-N11 2.392(4), Yb2-N2 2.452(4), Yb2-O1 2.345(3), Yb2-N4 2.475(4), Yb2-O2 2.339(3), Yb2-N5 2.312(4), Yb2-O3 2.156(3), Yb2-N13 2.408(4), N1-Yb1-O1 68.13(12), N3-Yb1-O2 67.88(12), N5-Yb2-O3 72.35(12).

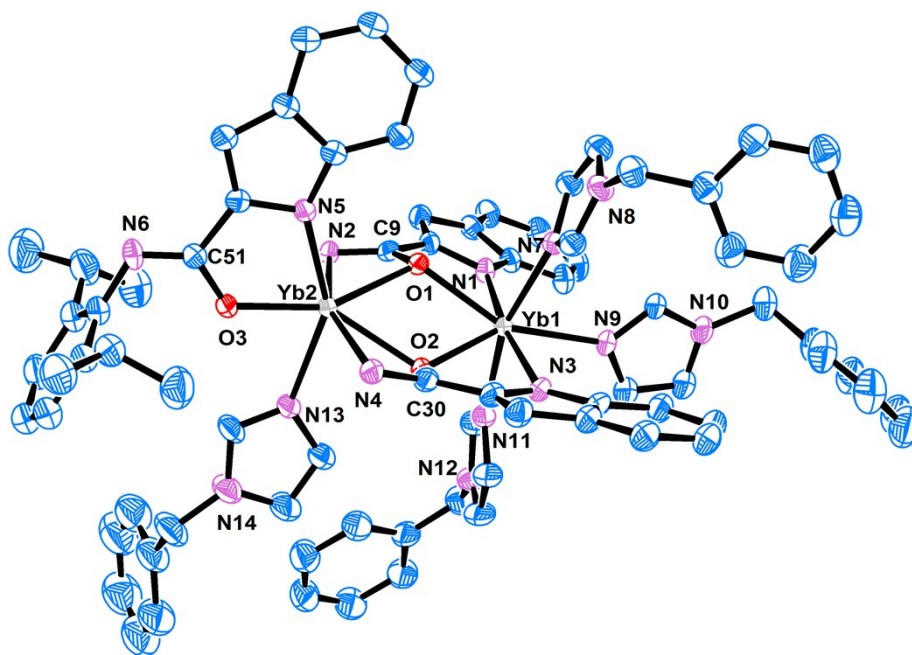

**Figure S46.** Single-crystal structure of the complex **1ef** with thermal ellipsoids at the 30% level, all hydrogen atoms and Dipp on N(2) and N(4) are omitted for clarity. Selected bond lengths (Å) and angles (°): Yb1-N1 2.396(4), Yb1-O1 2.283(3), Yb1-N3 2.424(4), Yb1-O2 2.263(3), Yb1-N7 2.389(4), Yb1-N9 2.429(4), Yb1-N11 2.392(4), Yb2-N2 2.435(4), Yb2-O1 2.360(3), Yb2-N4 2.466(4), Yb2-O2 2.368(3), Yb2-N5 2.307(4), Yb2-O3 2.139(3), Yb2-N13 2.415(4), N1-Yb1-O1 68.68(12), N3-Yb1-O2 67.74(13), N5-Yb2-O3 72.30(13).

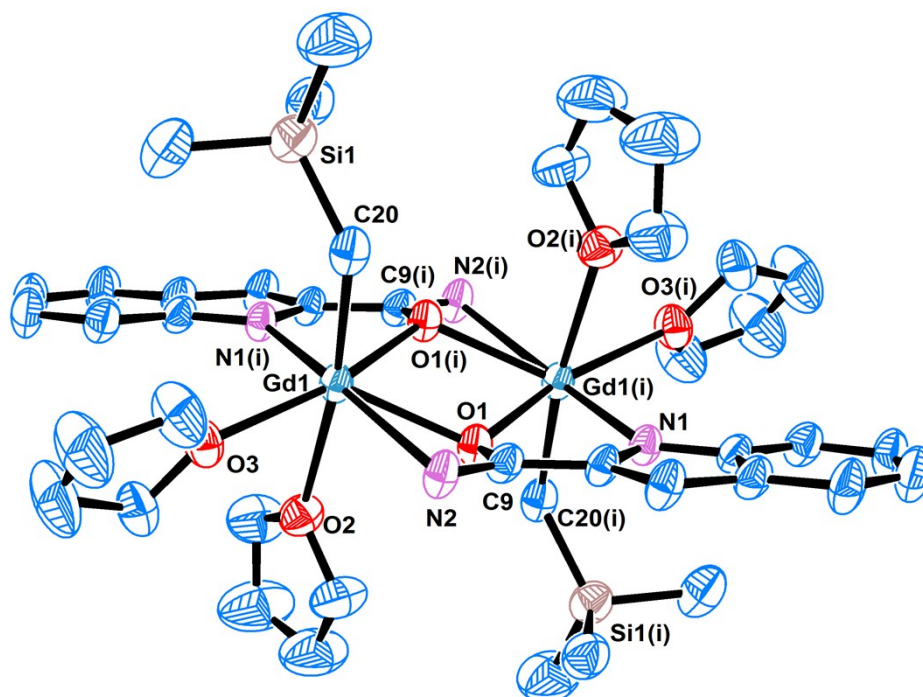

**Figure S47.** Single-crystal structure of the complex **2a** with thermal ellipsoids at the 30% level, all hydrogen atoms and *o*-BuC<sub>6</sub>H<sub>5</sub> on N2 and N2(i) are omitted for clarity. Selected bond lengths (Å) and angles (°): Gd1-C20 2.424(4), Gd1-O1(i) 2.324(2), Gd1-N1(i) 2.398(3), O1(i)-Gd1-N1(i) 66.39(9).

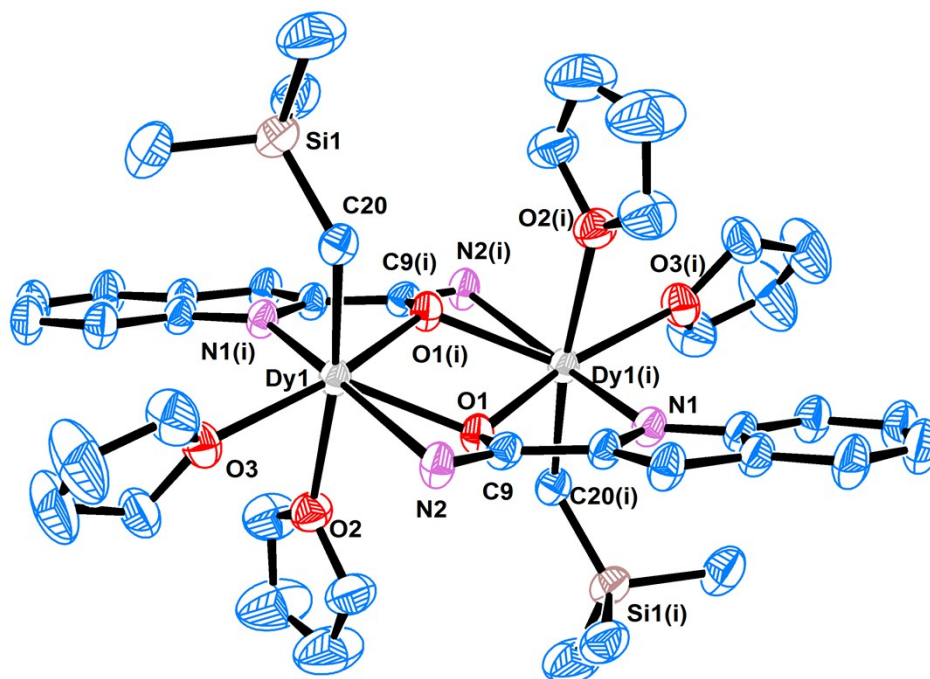

**Figure S48.** Single-crystal structure of the complex **2b** with thermal ellipsoids at the 30% level, all hydrogen atoms and *o*-BuC<sub>6</sub>H<sub>5</sub> on N2 and N2(i) are omitted for clarity. Selected bond lengths (Å) and angles (°): Dy1-C20 2.413(3), Dy1-O1(i) 2.2973(18), Dy1-N1(i) 2.364(2), O1(i)-Dy1-N1(i) 67.07(7).

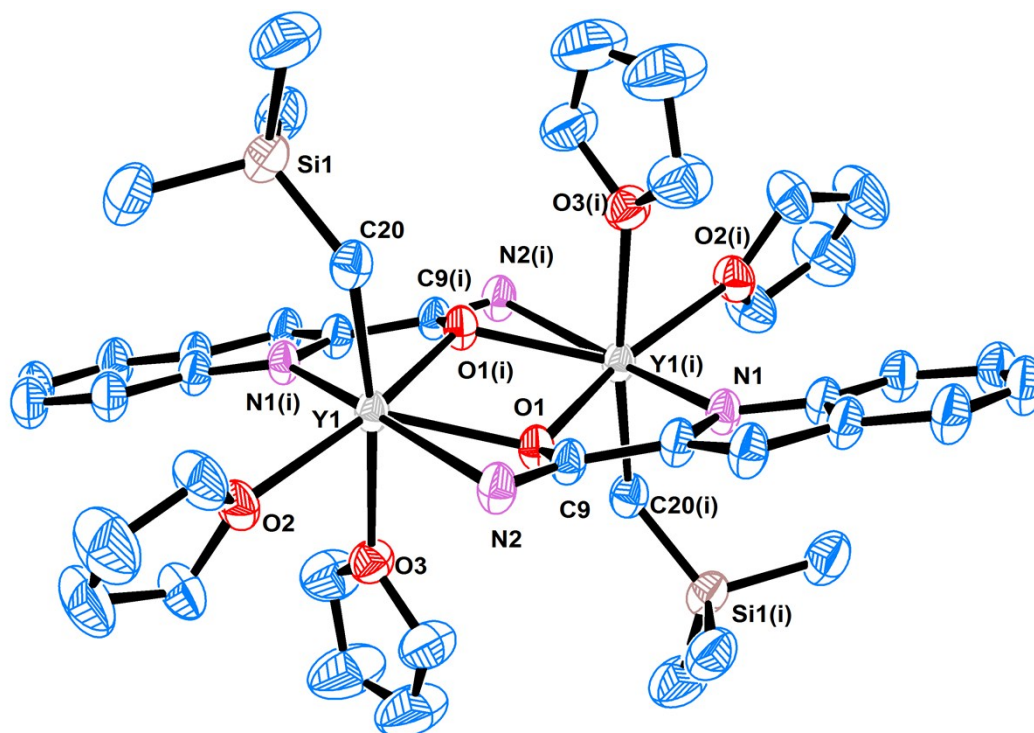

**Figure S49.** Single-crystal structure of the complex **2c** with thermal ellipsoids at the 30% level, all hydrogen atoms and *o*- $\text{BuC}_6\text{H}_5$  on N2 and N2(i) are omitted for clarity. Selected bond lengths ( $\text{\AA}$ ) and angles ( $^\circ$ ): Y1-C20 2.412(3), Y1-O1(i) 2.2785(18), Y1-N1(i) 2.367(2), O1(i)-Y1-N1(i) 67.43(7).

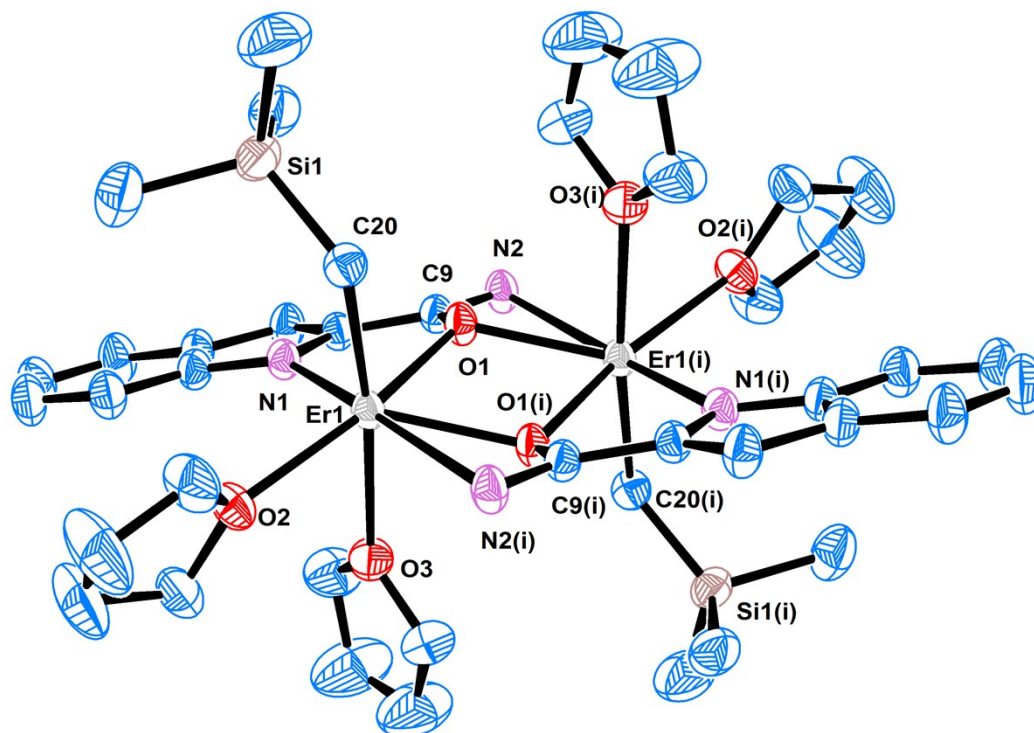

**Figure S50.** Single-crystal structure of the complex **2d** with thermal ellipsoids at the 30% level, all hydrogen atoms and *o*- $\text{BuC}_6\text{H}_5$  on N2 and N2(i) are omitted for clarity. Selected bond lengths ( $\text{\AA}$ ) and angles ( $^\circ$ ): Er1-C20 2.395(4), Er1-O1 2.2708(19), Er1-N1 2.341(3), O1-Er1-N1 67.75(8).

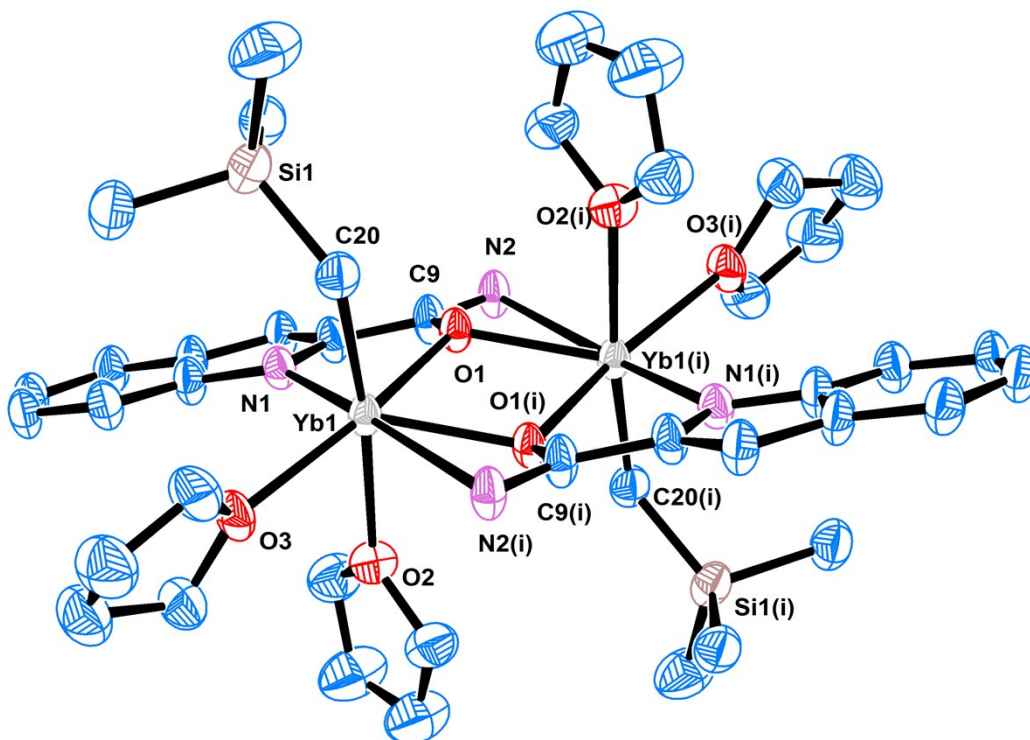

**Figure S51.** Single-crystal structure of the complex **2e** with thermal ellipsoids at the 30% level, all hydrogen atoms and *o*-BuC<sub>6</sub>H<sub>5</sub> on N2 and N2(i) are omitted for clarity. Selected bond lengths (Å) and angles (°): Yb1-C20 2.346(9), Yb1-O1 2.254(4), Yb1-N1 2.304(6), O1-Yb1-N1 68.3(2).

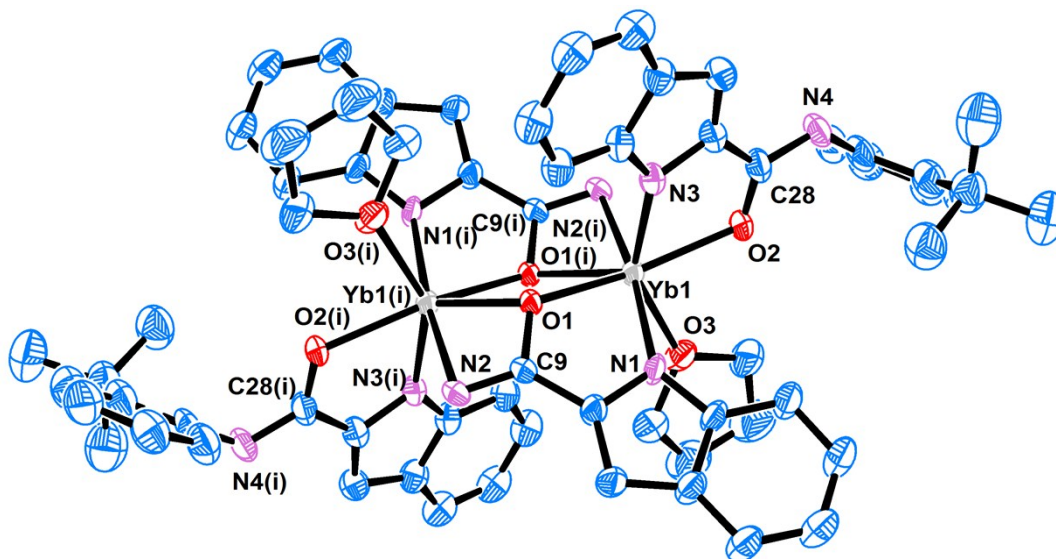

**Figure S52.** Single-crystal structure of the complex **2ea** with thermal ellipsoids at the 30% level, all hydrogen atoms and *o*-BuC<sub>6</sub>H<sub>5</sub> on N2 and N2(i) are omitted for clarity. Selected bond lengths (Å) and angles (°): Yb1-N1 2.319(6), Yb1-O1 2.268(4), Yb1-N3 2.307(6), Yb1-O2 2.247(4), Yb1-N2(i) 2.534(6), Yb1-O1(i) 2.328(4), N1-Yb1-O1 68.38(16), N3-Yb1-O2 71.60(19), N2(i)-Yb1-O1(i) 53.27(16).

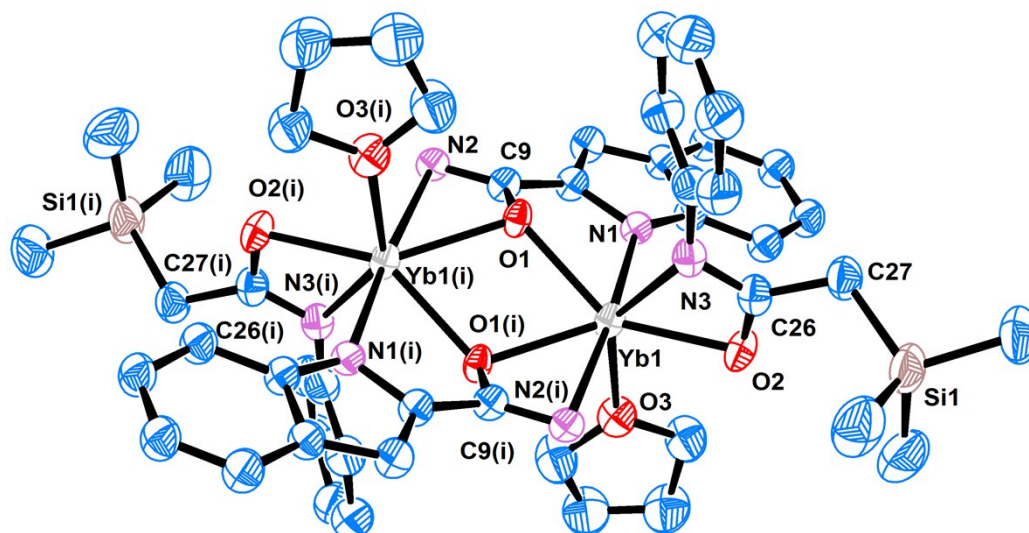

**Figure S53** Single-crystal structure of the complex **2eb** with thermal ellipsoids at the 30% level, all hydrogen atoms and *o*-BuC<sub>6</sub>H<sub>5</sub> on N2 and N2(i) are omitted for clarity. Selected bond lengths (Å) and angles (°): Yb1-N1 2.333(6), Yb1-O1 2.293(5), Yb1-N2(i) 2.462(6), Yb1-O1(i) 2.321(4), Yb1-N3 2.316(6), Yb1-O2 2.238(5), N1-Yb1-O1 69.71(19), N2(i)-Yb1-O1(i) 55.38(18), N3-Yb1-O2 57.4(2).

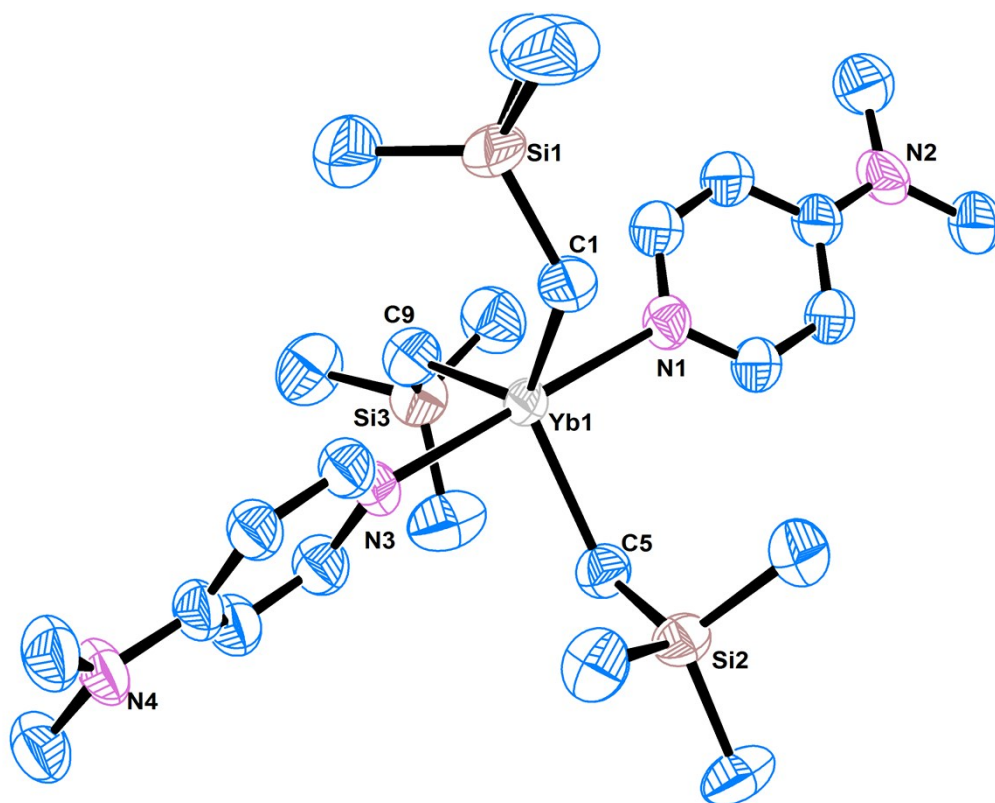

**Figure S54** Single-crystal structure of the complex **3a** with thermal ellipsoids at the 30% level, all hydrogen atoms are omitted for clarity. Selected bond lengths (Å) and angles (°): Yb1-C1 2.366(13), Yb1-C5 2.353(12), Yb1-C9 2.306(15), Yb1-N1 2.429(10), Yb1-N3 2.444(5), C1-Yb1-C5 120.2(5), C1-Yb1-C9 125.6(5), C5-Yb1-C9 117.2(5), N1-Yb1-C1 88.2(4), N1-Yb1-C5 92.3(4), N1-Yb1-C9 91.7(4), N3-Yb1-C1 90.9(4), N3-Yb1-C5 87.5(4), N3-Yb1-C9 89.5(4).

**Table S1.** Crystal data and structure refinement for **1a-1c**

|                                                  | <b>1a</b>                                                                                     | <b>1b</b>                                                                                     | <b>1c</b>                                                                                    |
|--------------------------------------------------|-----------------------------------------------------------------------------------------------|-----------------------------------------------------------------------------------------------|----------------------------------------------------------------------------------------------|
| Formula                                          | C <sub>66</sub> H <sub>98</sub> N <sub>4</sub> O <sub>6</sub> Si <sub>2</sub> Gd <sub>2</sub> | C <sub>66</sub> H <sub>98</sub> N <sub>4</sub> O <sub>6</sub> Si <sub>2</sub> Dy <sub>2</sub> | C <sub>66</sub> H <sub>98</sub> N <sub>4</sub> O <sub>6</sub> Si <sub>2</sub> Y <sub>2</sub> |
| FW                                               | 1414.16                                                                                       | 1424.66                                                                                       | 1227.48                                                                                      |
| T(K)                                             | 293(2)                                                                                        | 293(2)                                                                                        | 293(2)                                                                                       |
| $\lambda$ (Å)                                    | 0.71073                                                                                       | 0.71073                                                                                       | 0.71073                                                                                      |
| Crystal system                                   | Monoclinic                                                                                    | Monoclinic                                                                                    | Monoclinic                                                                                   |
| Space group                                      | <i>P2<sub>1</sub>/n</i>                                                                       | <i>P2<sub>1</sub>/n</i>                                                                       | <i>P2<sub>1</sub>/c</i>                                                                      |
| a(Å)                                             | 11.9048(10)                                                                                   | 11.8533(6)                                                                                    | 11.8210(19)                                                                                  |
| b(Å)                                             | 17.2036(15)                                                                                   | 17.2333(9)                                                                                    | 17.250(3)                                                                                    |
| c(Å)                                             | 17.5111(15)                                                                                   | 17.5236(9)                                                                                    | 19.936(3)                                                                                    |
| $\alpha$ (deg)                                   | 90                                                                                            | 90                                                                                            | 90                                                                                           |
| $\beta$ (deg)                                    | 97.0820(10)                                                                                   | 97.1180(10)                                                                                   | 118.885(7)                                                                                   |
| $\gamma$ (deg)                                   | 90                                                                                            | 90                                                                                            | 90                                                                                           |
| v(Å <sup>3</sup> )                               | 3559.0(5)                                                                                     | 3552.0(3)                                                                                     | 3559.4(10)                                                                                   |
| Z                                                | 2                                                                                             | 2                                                                                             | 2                                                                                            |
| D <sub>calcd</sub> (mg/m <sup>3</sup> )          | 1.320                                                                                         | 1.332                                                                                         | 1.192                                                                                        |
| $\mu$ (mm <sup>-1</sup> )                        | 1.928                                                                                         | 2.169                                                                                         | 1.703                                                                                        |
| F(000)                                           | 1452                                                                                          | 1460                                                                                          | 1352                                                                                         |
| $\theta$ range(deg)                              | 1.666-27.585                                                                                  | 1.664-27.547                                                                                  | 1.660-24.998                                                                                 |
| Reflections collected/unique                     | 39748/8153                                                                                    | 39805/8098                                                                                    | 25189/6260                                                                                   |
| R(int)                                           | 0.1049                                                                                        | 0.0340                                                                                        | 0.1247                                                                                       |
| Goodness-of-fit on $F^2$                         | 1.036                                                                                         | 1.067                                                                                         | 1.016                                                                                        |
| $R_1, wR_2$ [ $I > 2\sigma(I)$ ]                 | 0.0435, 0.0919                                                                                | 0.0483, 0.1264                                                                                | 0.0686, 0.1436                                                                               |
| $R_1, wR_2$ (all data)                           | 0.0719, 0.1173                                                                                | 0.0640, 0.1345                                                                                | 0.1745, 0.1938                                                                               |
| Largest diff. peak and hole(e. Å <sup>-3</sup> ) | 1.498 and -0.827                                                                              | 1.770 and -1.932                                                                              | 0.696 and -0.479                                                                             |



**Table S2.** Crystal data and structure refinement for **1d-1e**

|                                                                                     | <b>1d</b>                                                                                     | <b>1e</b>                                                                                     |
|-------------------------------------------------------------------------------------|-----------------------------------------------------------------------------------------------|-----------------------------------------------------------------------------------------------|
| Formula                                                                             | C <sub>66</sub> H <sub>98</sub> N <sub>4</sub> O <sub>6</sub> Si <sub>2</sub> Er <sub>2</sub> | C <sub>66</sub> H <sub>98</sub> N <sub>4</sub> O <sub>6</sub> Si <sub>2</sub> Yb <sub>2</sub> |
| FW                                                                                  | 1434.18                                                                                       | 1445.74                                                                                       |
| <i>T</i> (K)                                                                        | 293(2)                                                                                        | 293(2)                                                                                        |
| $\lambda$ (Å)                                                                       | 0.71073                                                                                       | 0.71073                                                                                       |
| Crystal system                                                                      | Monoclinic                                                                                    | Triclinic                                                                                     |
| Space group                                                                         | <i>P</i> 2 <sub>1</sub> / <i>n</i>                                                            | <i>P</i> $\bar{1}$                                                                            |
| <i>a</i> (Å)                                                                        | 11.8031(10)                                                                                   | 11.7367(7)                                                                                    |
| <i>b</i> (Å)                                                                        | 17.2359(15)                                                                                   | 18.4753(11)                                                                                   |
| <i>c</i> (Å)                                                                        | 17.5507(15)                                                                                   | 18.9841(12)                                                                                   |
| $\alpha$ (deg)                                                                      | 90                                                                                            | 87.5120(10)                                                                                   |
| $\beta$ (deg)                                                                       | 97.1660(10)                                                                                   | 77.8380(10)                                                                                   |
| $\gamma$ (deg)                                                                      | 90                                                                                            | 75.5950(10)                                                                                   |
| <i>v</i> (Å <sup>3</sup> )                                                          | 3542.6(5)                                                                                     | 3897.4(4)                                                                                     |
| <i>Z</i>                                                                            | 2                                                                                             | 2                                                                                             |
| <i>D</i> <sub>calcd</sub> (mg/m <sup>3</sup> )                                      | 1.345                                                                                         | 1.232                                                                                         |
| $\mu$ (mm <sup>-1</sup> )                                                           | 2.434                                                                                         | 2.459                                                                                         |
| <i>F</i> (000)                                                                      | 1468                                                                                          | 1476                                                                                          |
| $\theta$ range(deg)                                                                 | 1.662-27.551                                                                                  | 2.195-27.526                                                                                  |
| Reflections collected/unique                                                        | 39319/8081                                                                                    | 44382/17355                                                                                   |
| <i>R</i> (int)                                                                      | 0.1276                                                                                        | 0.0404                                                                                        |
| Goodness-of-fit on <i>F</i> <sup>2</sup>                                            | 1.064                                                                                         | 0.822                                                                                         |
| <i>R</i> <sub>1</sub> , <i>wR</i> <sub>2</sub> [ <i>I</i> >2 $\sigma$ ( <i>I</i> )] | 0.0504, 0.1241                                                                                | 0.0355, 0.0728                                                                                |
| <i>R</i> <sub>1</sub> , <i>wR</i> <sub>2</sub> (all data)                           | 0.0740, 0.1363                                                                                | 0.0692, 0.0808                                                                                |
| Largest diff. peak and hole(e. Å <sup>-3</sup> )                                    | 1.984 and -1.138                                                                              | 0.958 and -0.527                                                                              |

**Table S3.** Crystal data and structure refinement for **1ca-1cc**

|                                                                                      | <b>1ca</b>                                                                    | <b>1cb</b>                                                                                    | <b>1cc</b>                                                                   |
|--------------------------------------------------------------------------------------|-------------------------------------------------------------------------------|-----------------------------------------------------------------------------------------------|------------------------------------------------------------------------------|
| Formula                                                                              | C <sub>92</sub> H <sub>106</sub> N <sub>8</sub> O <sub>6</sub> Y <sub>2</sub> | C <sub>72</sub> H <sub>110</sub> N <sub>8</sub> O <sub>4</sub> Si <sub>2</sub> Y <sub>2</sub> | C <sub>66</sub> H <sub>92</sub> N <sub>6</sub> O <sub>6</sub> Y <sub>2</sub> |
| FW                                                                                   | 1597.66                                                                       | 1385.67                                                                                       | 1243.27                                                                      |
| <i>T</i> (K)                                                                         | 293(2)                                                                        | 293(2)                                                                                        | 293(2)                                                                       |
| $\lambda$ (Å)                                                                        | 0.71073                                                                       | 0.71073                                                                                       | 0.71073                                                                      |
| Crystal system                                                                       | Triclinic                                                                     | Monoclinic                                                                                    | Monoclinic                                                                   |
| Space group                                                                          | <i>P</i> $\bar{1}$                                                            | <i>P</i> 2 <sub>1</sub> / <i>c</i>                                                            | <i>P</i> 2 <sub>1</sub> / <i>n</i>                                           |
| <i>a</i> (Å)                                                                         | 11.8363(18)                                                                   | 15.081(2)                                                                                     | 11.4194(11)                                                                  |
| <i>b</i> (Å)                                                                         | 14.411(2)                                                                     | 17.316(3)                                                                                     | 15.3671(15)                                                                  |
| <i>c</i> (Å)                                                                         | 17.416(4)                                                                     | 17.270(3)                                                                                     | 18.6412(18)                                                                  |
| $\alpha$ (deg)                                                                       | 108.535(2)                                                                    | 90                                                                                            | 90                                                                           |
| $\beta$ (deg)                                                                        | 95.671(2)                                                                     | 103.702(2)                                                                                    | 90.1120(10)                                                                  |
| $\gamma$ (deg)                                                                       | 110.241(2)                                                                    | 90                                                                                            | 90                                                                           |
| <i>v</i> (Å <sup>3</sup> )                                                           | 2568.8(8)                                                                     | 4381.6(12)                                                                                    | 3271.2(5)                                                                    |
| <i>Z</i>                                                                             | 1                                                                             | 2                                                                                             | 2                                                                            |
| D <sub>calcd</sub> (mg/m <sup>3</sup> )                                              | 1.033                                                                         | 1.050                                                                                         | 1.262                                                                        |
| $\mu$ (mm <sup>-1</sup> )                                                            | 1.171                                                                         | 1.388                                                                                         | 1.818                                                                        |
| F(000)                                                                               | 840                                                                           | 1472                                                                                          | 1312                                                                         |
| $\theta$ range(deg)                                                                  | 1.269-27.584                                                                  | 2.364-24.998                                                                                  | 1.717-25.450                                                                 |
| Reflections collected/unique                                                         | 28955/11479                                                                   | 41329/7689                                                                                    | 32723/6048                                                                   |
| R(int)                                                                               | 0.1112                                                                        | 0.1651                                                                                        | 0.0447                                                                       |
| Goodness-of-fit on <i>F</i> <sup>2</sup>                                             | 0.980                                                                         | 0.832                                                                                         | 1.008                                                                        |
| <i>R</i> <sub>1</sub> , <i>wR</i> <sub>2</sub> [ <i>I</i> > 2 $\sigma$ ( <i>I</i> )] | 0.0720, 0.1888                                                                | 0.0615, 0.1152                                                                                | 0.0360, 0.0857                                                               |
| <i>R</i> <sub>1</sub> , <i>wR</i> <sub>2</sub> (all data)                            | 0.1063, 0.2067                                                                | 0.1529, 0.1361                                                                                | 0.0578, 0.0953                                                               |
| Largest diff. peak and hole(e. Å <sup>-3</sup> )                                     | 1.425 and -0.793                                                              | 0.444 and -0.259                                                                              | 0.391 and -0.260                                                             |

**Table S4.** Crystal data and structure refinement for **1ec-1ea**

|                                                                                      | <b>1ea</b>                                                                    | <b>1eb</b>                                                                                    | <b>1ec</b>                                                                                    |
|--------------------------------------------------------------------------------------|-------------------------------------------------------------------------------|-----------------------------------------------------------------------------------------------|-----------------------------------------------------------------------------------------------|
| Formula                                                                              | C <sub>74</sub> H <sub>86</sub> N <sub>4</sub> O <sub>6</sub> Yb <sub>2</sub> | C <sub>68</sub> H <sub>92</sub> N <sub>6</sub> O <sub>4</sub> Si <sub>2</sub> Yb <sub>2</sub> | C <sub>76</sub> H <sub>98</sub> N <sub>8</sub> O <sub>4</sub> Si <sub>2</sub> Yb <sub>2</sub> |
| FW                                                                                   | 1473.54                                                                       | 1459.73                                                                                       | 1589.88                                                                                       |
| <i>T</i> (K)                                                                         | 293(2)                                                                        | 293(2)                                                                                        | 293(2)                                                                                        |
| $\lambda$ (Å)                                                                        | 0.71073                                                                       | 0.71073                                                                                       | 0.71073                                                                                       |
| Crystal system                                                                       | Triclinic                                                                     | Monoclinic                                                                                    | Triclinic                                                                                     |
| Space group                                                                          | <i>P</i> $\bar{1}$                                                            | <i>C</i> 2/ <i>c</i>                                                                          | <i>P</i> $\bar{1}$                                                                            |
| <i>a</i> (Å)                                                                         | 12.8086(16)                                                                   | 27.113(2)                                                                                     | 13.0440(10)                                                                                   |
| <i>b</i> (Å)                                                                         | 16.837(2)                                                                     | 14.1425(11)                                                                                   | 13.8601(10)                                                                                   |
| <i>c</i> (Å)                                                                         | 20.863(3)                                                                     | 24.319(3)                                                                                     | 14.8195(11)                                                                                   |
| $\alpha$ (deg)                                                                       | 79.527(2)                                                                     | 90                                                                                            | 97.3780(10)                                                                                   |
| $\beta$ (deg)                                                                        | 76.232(2)                                                                     | 116.5790(10)                                                                                  | 113.2400(10)                                                                                  |
| $\gamma$ (deg)                                                                       | 89.163(2)                                                                     | 90                                                                                            | 114.7870(10)                                                                                  |
| <i>v</i> (Å <sup>3</sup> )                                                           | 4295.1(9)                                                                     | 8839.7(14)                                                                                    | 2091.8(3)                                                                                     |
| <i>Z</i>                                                                             | 2                                                                             | 4                                                                                             | 1                                                                                             |
| <i>D</i> <sub>calcd</sub> (mg/m <sup>3</sup> )                                       | 1.139                                                                         | 1.163                                                                                         | 1.262                                                                                         |
| $\mu$ (mm <sup>-1</sup> )                                                            | 2.206                                                                         | 2.298                                                                                         | 2.297                                                                                         |
| <i>F</i> (000)                                                                       | 1492                                                                          | 2968                                                                                          | 810                                                                                           |
| $\theta$ range(deg)                                                                  | 1.230-25.409                                                                  | 1.667-25.400                                                                                  | 1.598-25.324                                                                                  |
| Reflections collected/unique                                                         | 43638/15663                                                                   | 41364/7672                                                                                    | 21203/7595                                                                                    |
| <i>R</i> (int)                                                                       | 0.0788                                                                        | 0.0408                                                                                        | 0.0772                                                                                        |
| Goodness-of-fit on <i>F</i> <sup>2</sup>                                             | 0.872                                                                         | 1.012                                                                                         | 0.937                                                                                         |
| <i>R</i> <sub>1</sub> , <i>wR</i> <sub>2</sub> [ <i>I</i> > 2 $\sigma$ ( <i>I</i> )] | 0.0629, 0.1457                                                                | 0.0342, 0.0848                                                                                | 0.0531, 0.0976                                                                                |
| <i>R</i> <sub>1</sub> , <i>wR</i> <sub>2</sub> (all data)                            | 0.1222, 0.1646                                                                | 0.0511, 0.0929                                                                                | 0.0892, 0.1076                                                                                |
| Largest diff. peak and hole(e. Å <sup>-3</sup> )                                     | 1.014 and -0.810                                                              | 0.937 and -0.758                                                                              | 0.817 and -1.003                                                                              |

**Table S5.** Crystal data and structure refinement for **3a** and **1ed**

|                                                                                      | <b>3a</b>                                                         | <b>1ed</b>                                                                                      |
|--------------------------------------------------------------------------------------|-------------------------------------------------------------------|-------------------------------------------------------------------------------------------------|
| Formula                                                                              | C <sub>26</sub> H <sub>53</sub> N <sub>4</sub> Si <sub>3</sub> Yb | C <sub>78</sub> H <sub>106</sub> N <sub>12</sub> O <sub>2</sub> Si <sub>2</sub> Yb <sub>2</sub> |
| FW                                                                                   | 679.03                                                            | 1646.00                                                                                         |
| <i>T</i> (K)                                                                         | 293(2)                                                            | 293(2)                                                                                          |
| $\lambda$ (Å)                                                                        | 0.71073                                                           | 0.71073                                                                                         |
| Crystal system                                                                       | Triclinic                                                         | Triclinic                                                                                       |
| Space group                                                                          | <i>P</i> $\bar{1}$                                                | <i>P</i> $\bar{1}$                                                                              |
| <i>a</i> (Å)                                                                         | 10.477(3)                                                         | 12.1857(9)                                                                                      |
| <i>b</i> (Å)                                                                         | 12.806(4)                                                         | 14.6994(10)                                                                                     |
| <i>c</i> (Å)                                                                         | 13.939(4)                                                         | 15.6856(11)                                                                                     |
| $\alpha$ (deg)                                                                       | 93.672(3)                                                         | 103.6230(10)                                                                                    |
| $\beta$ (deg)                                                                        | 105.014(3)                                                        | 112.0460(10)                                                                                    |
| $\gamma$ (deg)                                                                       | 92.303(3)                                                         | 97.2230(10)                                                                                     |
| <i>v</i> (Å <sup>3</sup> )                                                           | 1799.5(9)                                                         | 2458.4(3)                                                                                       |
| <i>Z</i>                                                                             | 2                                                                 | 1                                                                                               |
| <i>D</i> <sub>calcd</sub> (mg/m <sup>3</sup> )                                       | 1.253                                                             | 1.112                                                                                           |
| $\mu$ (mm <sup>-1</sup> )                                                            | 2.716                                                             | 1.956                                                                                           |
| <i>F</i> (000)                                                                       | 698                                                               | 842                                                                                             |
| $\theta$ range(deg)                                                                  | 1.517-25.497                                                      | 1.472-25.384                                                                                    |
| Reflections collected/unique                                                         | 18060/6652                                                        | 25275/8980                                                                                      |
| <i>R</i> (int)                                                                       | 0.1655                                                            | 0.1287                                                                                          |
| Goodness-of-fit on <i>F</i> <sup>2</sup>                                             | 1.009                                                             | 0.959                                                                                           |
| <i>R</i> <sub>1</sub> , <i>wR</i> <sub>2</sub> [ <i>I</i> > 2 $\sigma$ ( <i>I</i> )] | 0.0805, 0.1831                                                    | 0.0517, 0.1131                                                                                  |
| <i>R</i> <sub>1</sub> , <i>wR</i> <sub>2</sub> (all data)                            | 0.1294, 0.2082                                                    | 0.0718, 0.1204                                                                                  |
| Largest diff. peak and hole(e.<br>Å <sup>-3</sup> )                                  | 1.633 and -1.286                                                  | 0.995 and -1.006                                                                                |

**Table S6.** Crystal data and structure refinement for **1ee-1ef**

|                                                                                     | <b>1ee</b>                                                                     | <b>1ef</b>                                                                       |
|-------------------------------------------------------------------------------------|--------------------------------------------------------------------------------|----------------------------------------------------------------------------------|
| Formula                                                                             | C <sub>79</sub> H <sub>90</sub> N <sub>14</sub> O <sub>3</sub> Yb <sub>2</sub> | C <sub>103</sub> H <sub>106</sub> N <sub>14</sub> O <sub>3</sub> Yb <sub>2</sub> |
| FW                                                                                  | 1629.72                                                                        | 1934.09                                                                          |
| <i>T</i> (K)                                                                        | 293(2)                                                                         | 293(2)                                                                           |
| $\lambda$ (Å)                                                                       | 0.71073                                                                        | 0.71073                                                                          |
| Crystal system                                                                      | Monoclinic                                                                     | Triclinic                                                                        |
| Space group                                                                         | <i>P</i> 2 <sub>1</sub> / <i>c</i>                                             | <i>P</i> $\bar{1}$                                                               |
| <i>a</i> (Å)                                                                        | 14.5555(10)                                                                    | 14.7004(8)                                                                       |
| <i>b</i> (Å)                                                                        | 30.698(2)                                                                      | 14.9519(9)                                                                       |
| <i>c</i> (Å)                                                                        | 20.3236(14)                                                                    | 23.7312(14)                                                                      |
| $\alpha$ (deg)                                                                      | 90                                                                             | 101.4710(10)                                                                     |
| $\beta$ (deg)                                                                       | 92.8790(10)                                                                    | 96.2690(10)                                                                      |
| $\gamma$ (deg)                                                                      | 90                                                                             | 93.2780(10)                                                                      |
| <i>v</i> (Å <sup>3</sup> )                                                          | 9069.5(11)                                                                     | 5064.6(5)                                                                        |
| <i>Z</i>                                                                            | 4                                                                              | 2                                                                                |
| <i>D</i> <sub>calcd</sub> (mg/m <sup>3</sup> )                                      | 1.194                                                                          | 1.268                                                                            |
| $\mu$ (mm <sup>-1</sup> )                                                           | 2.097                                                                          | 1.888                                                                            |
| <i>F</i> (000)                                                                      | 3304                                                                           | 1972                                                                             |
| $\theta$ range(deg)                                                                 | 1.203-25.399                                                                   | 1.394-25.372                                                                     |
| Reflections collected/unique                                                        | 92129/16660                                                                    | 52092/18488                                                                      |
| <i>R</i> (int)                                                                      | 0.0868                                                                         | 0.0916                                                                           |
| Goodness-of-fit on <i>F</i> <sup>2</sup>                                            | 1.026                                                                          | 0.984                                                                            |
| <i>R</i> <sub>1</sub> , <i>wR</i> <sub>2</sub> [ <i>I</i> >2 $\sigma$ ( <i>I</i> )] | 0.0417, 0.0965                                                                 | 0.0461, 0.1099                                                                   |
| <i>R</i> <sub>1</sub> , <i>wR</i> <sub>2</sub> (all data)                           | 0.0515, 0.1019                                                                 | 0.0678, 0.1187                                                                   |
| Largest diff. peak and hole(e. Å <sup>-3</sup> )                                    | 1.385 and -0.904                                                               | 1.562 and -0.925                                                                 |

**Table S7.** Crystal data and structure refinement for **2a-2c**

|                                                                                      | <b>2a</b>                                                                                     | <b>2b</b>                                                                                     | <b>2c</b>                                                                                    |
|--------------------------------------------------------------------------------------|-----------------------------------------------------------------------------------------------|-----------------------------------------------------------------------------------------------|----------------------------------------------------------------------------------------------|
| Formula                                                                              | C <sub>62</sub> H <sub>90</sub> N <sub>4</sub> O <sub>6</sub> Si <sub>2</sub> Gd <sub>2</sub> | C <sub>62</sub> H <sub>90</sub> N <sub>4</sub> O <sub>6</sub> Si <sub>2</sub> Dy <sub>2</sub> | C <sub>62</sub> H <sub>90</sub> N <sub>4</sub> O <sub>6</sub> Si <sub>2</sub> Y <sub>2</sub> |
| FW                                                                                   | 1358.05                                                                                       | 1368.55                                                                                       | 1221.37                                                                                      |
| <i>T</i> (K)                                                                         | 293(2)                                                                                        | 293(2)                                                                                        | 293(2)                                                                                       |
| $\lambda$ (Å)                                                                        | 0.71073                                                                                       | 0.71073                                                                                       | 0.71073                                                                                      |
| Crystal system                                                                       | Monoclinic                                                                                    | Monoclinic                                                                                    | Monoclinic                                                                                   |
| Space group                                                                          | <i>C2/c</i>                                                                                   | <i>C2/c</i>                                                                                   | <i>C2/c</i>                                                                                  |
| <i>a</i> (Å)                                                                         | 30.2539(18)                                                                                   | 30.336(3)                                                                                     | 30.302(4)                                                                                    |
| <i>b</i> (Å)                                                                         | 14.9846(9)                                                                                    | 14.9931(15)                                                                                   | 14.9856(15)                                                                                  |
| <i>c</i> (Å)                                                                         | 22.6708(13)                                                                                   | 22.644(2)                                                                                     | 22.640(3)                                                                                    |
| $\alpha$ (deg)                                                                       | 90                                                                                            | 90                                                                                            | 90                                                                                           |
| $\beta$ (deg)                                                                        | 117.5380(10)                                                                                  | 118.1020(10)                                                                                  | 118.104(2)                                                                                   |
| $\gamma$ (deg)                                                                       | 90                                                                                            | 90                                                                                            | 90                                                                                           |
| <i>v</i> (Å <sup>3</sup> )                                                           | 9113.2(9)                                                                                     | 9085.0(16)                                                                                    | 9068.6(17)                                                                                   |
| <i>Z</i>                                                                             | 4                                                                                             | 4                                                                                             | 4                                                                                            |
| <i>D</i> <sub>calcd</sub> (mg/m <sup>3</sup> )                                       | 0.990                                                                                         | 1.001                                                                                         | 0.895                                                                                        |
| $\mu$ (mm <sup>-1</sup> )                                                            | 1.504                                                                                         | 1.693                                                                                         | 1.335                                                                                        |
| <i>F</i> (000)                                                                       | 2776                                                                                          | 2792                                                                                          | 2576                                                                                         |
| $\theta$ range(deg)                                                                  | 2.026-27.498                                                                                  | 1.522-27.480                                                                                  | 1.654-27.536                                                                                 |
| Reflections collected/unique                                                         | 38364/10322                                                                                   | 49894/10299                                                                                   | 48881/10204                                                                                  |
| <i>R</i> (int)                                                                       | 0.0701                                                                                        | 0.0386                                                                                        | 0.0879                                                                                       |
| Goodness-of-fit on <i>F</i> <sup>2</sup>                                             | 0.794                                                                                         | 1.078                                                                                         | 0.954                                                                                        |
| <i>R</i> <sub>1</sub> , <i>wR</i> <sub>2</sub> [ <i>I</i> > 2 $\sigma$ ( <i>I</i> )] | 0.0402, 0.0711                                                                                | 0.0328, 0.0773                                                                                | 0.0503, 0.1151                                                                               |
| <i>R</i> <sub>1</sub> , <i>wR</i> <sub>2</sub> (all data)                            | 0.0926, 0.0788                                                                                | 0.0506, 0.0828                                                                                | 0.1167, 0.1389                                                                               |
| Largest diff. peak and hole(e. Å <sup>-3</sup> )                                     | 0.620 and -0.437                                                                              | 2.132 and -0.790                                                                              | 0.513 and -0.376                                                                             |

**Table S8.** Crystal data and structure refinement for **2d-2e**

|                                                                                      | <b>2d</b>                                                                                     | <b>2e</b>                                                                                     |
|--------------------------------------------------------------------------------------|-----------------------------------------------------------------------------------------------|-----------------------------------------------------------------------------------------------|
| Formula                                                                              | C <sub>62</sub> H <sub>90</sub> N <sub>4</sub> O <sub>6</sub> Si <sub>2</sub> Er <sub>2</sub> | C <sub>62</sub> H <sub>90</sub> N <sub>4</sub> O <sub>6</sub> Si <sub>2</sub> Yb <sub>2</sub> |
| FW                                                                                   | 1378.07                                                                                       | 1389.63                                                                                       |
| <i>T</i> (K)                                                                         | 293(2)                                                                                        | 293(2)                                                                                        |
| $\lambda$ (Å)                                                                        | 0.71073                                                                                       | 0.71073                                                                                       |
| Crystal system                                                                       | Monoclinic                                                                                    | Monoclinic                                                                                    |
| Space group                                                                          | <i>C2/c</i>                                                                                   | <i>C2/c</i>                                                                                   |
| <i>a</i> (Å)                                                                         | 30.328(5)                                                                                     | 30.273(4)                                                                                     |
| <i>b</i> (Å)                                                                         | 14.9950(19)                                                                                   | 15.0332(17)                                                                                   |
| <i>c</i> (Å)                                                                         | 22.623(4)                                                                                     | 22.541(3)                                                                                     |
| $\alpha$ (deg)                                                                       | 90                                                                                            | 90                                                                                            |
| $\beta$ (deg)                                                                        | 118.215(3)                                                                                    | 118.311(3)                                                                                    |
| $\gamma$ (deg)                                                                       | 90                                                                                            | 90                                                                                            |
| <i>v</i> (Å <sup>3</sup> )                                                           | 9066(2)                                                                                       | 9031(2)                                                                                       |
| <i>Z</i>                                                                             | 4                                                                                             | 4                                                                                             |
| <i>D</i> <sub>calcd</sub> (mg/m <sup>3</sup> )                                       | 1.010                                                                                         | 1.022                                                                                         |
| $\mu$ (mm <sup>-1</sup> )                                                            | 1.900                                                                                         | 2.120                                                                                         |
| <i>F</i> (000)                                                                       | 2808                                                                                          | 2824                                                                                          |
| $\theta$ range(deg)                                                                  | 1.524-27.553                                                                                  | 1.555-27.563                                                                                  |
| Reflections collected/unique                                                         | 36649/10241                                                                                   | 49016/10228                                                                                   |
| <i>R</i> (int)                                                                       | 0.0417                                                                                        | 0.1596                                                                                        |
| Goodness-of-fit on <i>F</i> <sup>2</sup>                                             | 1.056                                                                                         | 0.953                                                                                         |
| <i>R</i> <sub>1</sub> , <i>wR</i> <sub>2</sub> [ <i>I</i> > 2 $\sigma$ ( <i>I</i> )] | 0.0356, 0.0808                                                                                | 0.0656, 0.1273                                                                                |
| <i>R</i> <sub>1</sub> , <i>wR</i> <sub>2</sub> (all data)                            | 0.0566, 0.0876                                                                                | 0.1642, 0.1610                                                                                |
| Largest diff. peak and hole(e. Å <sup>-3</sup> )                                     | 2.235 and -0.944                                                                              | 2.770 and -1.374                                                                              |

**Table S9.** Crystal data and structure refinement for **2ea-2eb**

|                                                                                      | <b>2ea</b>                                                                    | <b>2eb</b>                                                                                    |
|--------------------------------------------------------------------------------------|-------------------------------------------------------------------------------|-----------------------------------------------------------------------------------------------|
| Formula                                                                              | C <sub>84</sub> H <sub>90</sub> N <sub>8</sub> O <sub>6</sub> Yb <sub>2</sub> | C <sub>68</sub> H <sub>84</sub> N <sub>6</sub> O <sub>6</sub> Si <sub>2</sub> Yb <sub>2</sub> |
| FW                                                                                   | 1653.71                                                                       | 1483.67                                                                                       |
| <i>T</i> (K)                                                                         | 293(2)                                                                        | 293(2)                                                                                        |
| $\lambda$ (Å)                                                                        | 0.71073                                                                       | 0.71073                                                                                       |
| Crystal system                                                                       | Monoclinic                                                                    | Triclinic                                                                                     |
| Space group                                                                          | <i>C2/c</i>                                                                   | <i>P</i> $\bar{1}$                                                                            |
| <i>a</i> (Å)                                                                         | 32.297(7)                                                                     | 11.095(4)                                                                                     |
| <i>b</i> (Å)                                                                         | 14.388(3)                                                                     | 14.589(6)                                                                                     |
| <i>c</i> (Å)                                                                         | 25.203(9)                                                                     | 16.114(6)                                                                                     |
| $\alpha$ (deg)                                                                       | 90                                                                            | 112.592(4)                                                                                    |
| $\beta$ (deg)                                                                        | 128.886(2)                                                                    | 91.520(5)                                                                                     |
| $\gamma$ (deg)                                                                       | 90                                                                            | 110.684(5)                                                                                    |
| <i>v</i> (Å <sup>3</sup> )                                                           | 9116(4)                                                                       | 2212.8(15)                                                                                    |
| <i>Z</i>                                                                             | 4                                                                             | 1                                                                                             |
| <i>D</i> <sub>calcd</sub> (mg/m <sup>3</sup> )                                       | 1.205                                                                         | 1.113                                                                                         |
| $\mu$ (mm <sup>-1</sup> )                                                            | 2.087                                                                         | 2.168                                                                                         |
| <i>F</i> (000)                                                                       | 3352                                                                          | 750                                                                                           |
| $\theta$ range(deg)                                                                  | 1.620-25.355                                                                  | 1.394-25.711                                                                                  |
| Reflections collected/unique                                                         | 43301/8320                                                                    | 21550/8258                                                                                    |
| <i>R</i> (int)                                                                       | 0.0635                                                                        | 0.0589                                                                                        |
| Goodness-of-fit on <i>F</i> <sup>2</sup>                                             | 1.027                                                                         | 1.084                                                                                         |
| <i>R</i> <sub>1</sub> , <i>wR</i> <sub>2</sub> [ <i>I</i> > 2 $\sigma$ ( <i>I</i> )] | 0.0555, 0.1410                                                                | 0.0704, 0.1882                                                                                |
| <i>R</i> <sub>1</sub> , <i>wR</i> <sub>2</sub> (all data)                            | 0.0757, 0.1587                                                                | 0.0826, 0.2032                                                                                |
| Largest diff. peak and hole(e.<br>Å <sup>-3</sup> )                                  | 3.127 and -1.209                                                              | 4.153 and -3.401                                                                              |
